1 **Rift Valley fever virus induces fetal demise through direct placental infection**

2 Cynthia M. McMillen<sup>1,2</sup>, Nitin Arora<sup>3</sup>, Devin A. Boyles<sup>1,2</sup>, Joseph R. Albe<sup>1,2</sup>, Michael R.  
3 Kujawa<sup>1,2</sup>, Jeffrey F. Bonadio<sup>6</sup>, Carolyn B. Coyne<sup>4,5</sup>, and Amy L. Hartman<sup>1,2\*</sup>

4 <sup>1</sup>Center for Vaccine Research, University of Pittsburgh, Pittsburgh, PA, USA

5 <sup>2</sup>Department of Infectious Diseases and Microbiology, University of Pittsburgh School of Public  
6 Health, Pittsburgh, PA, USA

7 <sup>3</sup>Department of Pediatrics, University of Alabama at Birmingham, Birmingham, AL, USA

8 <sup>4</sup>Department of Pediatrics, University of Pittsburgh School of Medicine, Pittsburgh, PA, USA

9 <sup>5</sup>Center for Microbial Pathogenesis, Children's Hospital of Pittsburgh of the University of  
10 Pittsburgh Medical Center, Pittsburgh, PA, USA

11 <sup>6</sup>Department of Pathology, Magee Women's Hospital of the University of Pittsburgh Medical  
12 Center, Pittsburgh, PA, USA

13 \*Corresponding author

14 **Abstract:**

15 Rift Valley fever virus (RVFV) infections in pregnant livestock are associated with high  
16 rates of fetal demise and have been linked to miscarriage in pregnant women. To address how  
17 acute RVFV infection during pregnancy causes detrimental effects on the fetus, we developed an  
18 immunocompetent pregnant rodent model of RVFV infection. We found that pregnant rats were  
19 more susceptible to RVFV-induced death than their non-pregnant counterparts and that RVFV  
20 infection resulted in intrauterine fetal death and severe congenital abnormalities, even in pups from  
21 infected asymptomatic pregnant rats. Virus distribution in infected dams was widespread, with a  
22 previously unrecognized preference for infection, replication, and tissue damage in the placenta.  
23 In human mid-gestation placental tissue, RVFV directly infected placental chorionic villi, with  
24 replication detected in the outermost syncytial layer. Our work identifies direct placental infection  
25 by RVFV as a mechanism for vertical transmission and points to the teratogenic potential of this  
26 virus in humans. This is the first time vertical transmission of RVFV has been shown in species

27 other than livestock. This study highlights the potential impact of a future epidemic of this  
28 emerging mosquito-borne virus.

## 29 **Introduction**

30 Rift Valley fever (RVF) is a veterinary disease of domesticated livestock that is frequently  
31 transmitted to humans. RVF virus (RVFV; *Phenuiviridae*; formerly *Bunyaviridae*) is currently  
32 endemic in many regions of Africa and is transmitted by a range of mosquito species (1-4).  
33 Prominent instances of emergence of RVFV in new areas (such as Egypt in 1977-78 and Saudi  
34 Arabia in 2000-01) have caused concern for further spread given that mosquito species found in  
35 Europe and the Americas could potentially harbor and transmit RVFV (5-7). The World Health  
36 Organization warns of a pending public health emergency caused by RVF due to insufficient  
37 vaccines and therapeutics (8).

38 Epizootic outbreaks of RVF predominantly affect young ruminants such as sheep, goats,  
39 cattle, and camels. Within a given outbreak, infected animals succumb to disease characterized by  
40 fulminant hepatic necrosis (9). The most notable and economically devastating outcome of RVF  
41 is the “abortion storm” that sweeps through herds of pregnant livestock, with abortogenic rates  
42 reaching as high as 90-100% in pregnant ewes (10,11). Even live-attenuated veterinary vaccines  
43 induce abortions in pregnant animals and cause physical abnormalities in fetuses and newborns  
44 (12).

45 In humans, RVF disease is primarily an acute febrile illness accompanied by body aches  
46 and joint pain, with occasional progression to more severe systemic disease. Data from human  
47 outbreaks, while limited, suggest that vertical transmission of RVFV to the developing human  
48 fetus can occur with detrimental outcomes. Two published cases of vertical transmission resulted

49 in infection and pathological outcomes in the fetuses. In one instance, a pregnant woman became  
50 acutely infected with RVFV, resulting in delivery of an infant with rash, enlarged liver and spleen,  
51 and jaundice (13). In another family where 9 members recently contracted RVF (one of whom  
52 died), a pregnant woman displayed clinical signs of RVF a few days before labor and delivered an  
53 infant who subsequently died of RVF within a week (14). In a recent study in Sudan, pregnant  
54 women with confirmed RVF illness during pregnancy had higher rates of 2<sup>nd</sup> and 3<sup>rd</sup> trimester  
55 miscarriages or stillbirths (odds ratio of 7.4) (15).

56         Given the high incidence of fetal abortions in livestock and the potential for miscarriage in  
57 pregnant women, this study addressed vertical transmission of RVFV in non-livestock species and  
58 the susceptibility of human placental tissue to RVFV infection. Using immunocompetent Sprague-  
59 Dawley rats infected with a wild-type pathogenic strain of RVFV, we demonstrate direct vertical  
60 transmission and intrauterine fetal death similar to that observed in livestock. Importantly, vertical  
61 transmission occurred in pregnant dams with no clinical signs of disease, even after infection  
62 during late-gestation when the placenta is fully-formed. Antenatal infection resulted in delivery of  
63 stillborn pups with stunted development and gross anatomical changes. Remarkably, for a  
64 hepatotropic virus, the placenta had a higher viral burden than the liver and other maternal organs.  
65 *Ex vivo* inoculation of second-trimester human fetal tissue explants with RVFV resulted in active  
66 replication in the syncytiotrophoblast layer of the placenta, a structure typically resistant to viral  
67 infections. This is the first *in vivo* study to recapitulate the teratogenic effects of RVFV infection  
68 in livestock and the first time RVFV has been shown to directly infect human placental tissue. This  
69 study also highlights the previously unrecognized and potentially severe effects of RVFV infection  
70 in pregnant women.

## 71 **Methods**

72 *Ethics Statement*

73 All animal work described here was carried out in strict accordance with the Guide for the  
74 Care and Use of Laboratory Animals of the National Institutes of Health (NIH) and the Animal  
75 Welfare Act (AWA). The protocol was approved and overseen by the University of Pittsburgh  
76 Institutional Animal Care and Use Committee (IACUC). The Association for Assessment and  
77 Accreditation of Laboratory Animal Care (AAALAC) has fully accredited the University of  
78 Pittsburgh.

79 *Biosafety information*

80 All work with live RVFV was conducted at BSL-3 in the University of Pittsburgh Regional  
81 Biocontainment Laboratory (RBL). For respiratory protection, personnel wore powered air  
82 purifying respirators (PAPRs; Versaflo TR-300, 3M) and used a class III biological safety cabinet.  
83 All animals were housed in individually-ventilated micro-isolator caging (Allentown, Inc).  
84 Vesphene IIs (1:128 dilution, Steris Corporation) was used to disinfect all liquid wastes and  
85 surfaces at risk of contact with the infectious agent. The RBL is a shower-out facility that requires  
86 a full clothing change into scrubs prior to entry and a personal shower and new scrubs upon exit.  
87 All solid wastes, used caging, and animal wastes, were steam-sterilized. Animal carcasses were  
88 incinerated or digested via alkaline hydrolysis (Peerless Waste Solutions). All tissues or samples  
89 destined for removal from BSL-3 were inactivated using methods described below; all inactivation  
90 methods have been verified and approved by a University of Pittsburgh biosafety oversight  
91 committee. The University of Pittsburgh Regional Biocontainment Laboratory is a registered  
92 entity with the Centers for Disease Control and Prevention and the United States Department of  
93 Agriculture for work with RVFV.

94 *Virus and cell culture*

95 Virulent RVFV strain ZH501, generated from reverse genetics plasmids (16), was  
96 generously provided by Barry Miller (CDC, Ft. Collins, CO) and Stuart Nichol (CDC, Atlanta).  
97 Virus was propagated on Vero E6 (ATCC; CRL-1586) cells using standard methods. Viral titer  
98 was determined by standard viral plaque assay (VPA). Briefly, 200  $\mu$ L tissue homogenates or  
99 supernatant serial-diluted in D2 media (Dulbecco's Modified Eagle Medium, 2% FBS, 1%  
100 penicillin/streptomycin) was plated on 6-well plates (Corning) containing Vero E6 cells at 90-95%  
101 confluency. Plates were incubated (37°C, 5% CO<sub>2</sub>) for 1 hour for viral adsorption and rocked every  
102 15 minutes. Following incubation, the virus inoculum was removed and replaced with 3 mL of  
103 agarose overlay (Minimum Essential Medium, 2% FBS, 1% penicillin/streptomycin, 1.5% (1M)  
104 HEPES buffer, and 0.8% SeaKem agarose). Plates were incubated for 3 days at 37°C, 5% CO<sub>2</sub> to  
105 allow plaque formation. Plates were treated with 2 mL 10% formaldehyde for 4 hours for cell  
106 fixation and virus inactivation. Plaques were visualized after crystal violet (CV) staining (0.1%  
107 CV solution in 20% EtOH) and quantitated using the following equation: Average # plaques x 5  
108 (dilution factor) x dilution = PFU/ml.

109 *Animals*

110 Age-matched non-pregnant and time-mated Sprague Dawley rats (SD; 6-8 weeks) were  
111 obtained from Envigo Laboratories. A positive copulation plug verified pregnancy for early-  
112 gestation (embryonic day 5; E5) and late-gestation (embryonic day 14; E14) females. All pregnant  
113 rats were delivered to individual cages and non-pregnant rats were housed three to a cage in  
114 temperature-controlled rooms with a 12-hour day/12-hour night light schedule. Food (IsoPro  
115 Rodent 3000) and water were provided *ad libitum*. Rats were implanted with programmable

116 temperature transponders (IPTT-300; Bio Medic Data Systems) subcutaneously between the  
117 shoulder blades. For infection, all rats were anesthetized by inhalation of isoflurane vapors  
118 (IsoThesia, Henry Schein) and inoculated subcutaneously in the hind flank with 500  $\mu$ L of RVFV  
119 diluted in D2 media. Weight and body temperature were recorded daily starting the day of  
120 infection. Additionally, each animal was closely monitored twice daily for the development of  
121 clinical signs. Endpoint criteria, which prompts immediate euthanasia, was defined based on  
122 weight, temperature, appearance, and behavioral scoring parameters. Once euthanasia criteria were  
123 met, rats were anesthetized by inhalation of isoflurane vapors followed by an immediate blood  
124 draw and euthanasia by cardiac puncture.

125 Rats were inoculated on E14 with the following doses of RVFV strain ZH501:  $7.5 \times 10^1$   
126 pfu (n=5),  $1.8 \times 10^2$  pfu (n=6),  $1.5 \times 10^3$  pfu (n=11) and  $2.6 \times 10^4$  pfu (n=6). Unless dams met  
127 euthanasia criteria, they progressed to full-term and delivered pups on E22 (8 dpi). After delivery,  
128 dams and pups were not disturbed until 5 days post-delivery (13 dpi) to reduce stress. Added stress  
129 on the dams can lead to consumption of newborn pups by dam (17,18). Weight monitoring of pups  
130 began on neonatal day 5 (13 dpi) until 18 dpi when both dam and pups were euthanized at the pre-  
131 determined end of the study (Fig. 1A).

132 One rat at embryonic day 5 (E5) was infected with  $1.5 \times 10^5$  pfu of RVFV. A non-infected  
133 dam at E5 gestation was observed in parallel. Dams were euthanized at a pre-determined date of 7  
134 days post-infection, corresponding to embryonic day 13.

135 Age-matched non-pregnant rats were inoculated with the following doses of RVFV strain  
136 ZH501:  $3.1 \times 10^3$  pfu (n=11),  $3.5 \times 10^4$  pfu (n=5),  $1.3 \times 10^5$  pfu (n=6). Unless the non-pregnant

137 rats met euthanasia criteria and were euthanized, the rats were euthanized at a pre-determined end  
138 date of the study at 16 dpi.

139       Upon necropsy, tissues were harvested and suspended in 2x weight/volume D2 media and  
140 homogenized using an Omni tissue homogenizer (Omni International). Tissue homogenates were  
141 used to quantitate infectious virus by VPA inside of the BSL-3 facility. For quantitation of RVFV-  
142 specific viral RNA by q-RT-PCR analysis, 100  $\mu$ L of each tissue homogenate was inactivated in  
143 900  $\mu$ L Tri-Reagent (Invitrogen) for ten minutes prior to removal from the BSL-3 facility.  
144 Subsequent storage at -80°C or RNA isolation and q-RT-PCR analyses occurred in a BSL-2  
145 setting.

#### 146 *RNA isolation and q-RT-PCR*

147       RNA isolation was performed using a modified Invitrogen PureLink Viral RNA/DNA kit  
148 protocol. Briefly, 200  $\mu$ L of chloroform was added to the tissue homogenate/Tri-Reagent, mixed,  
149 then centrifuged at 4°C at 12,000 x g for 15 minutes to separate the organic phase from the aqueous  
150 phase (contains RNA). The aqueous phase of the cell lysates was collected then mixed with an  
151 equal volume of 70% ethanol, then the sample was applied to the PureLink spin column. The  
152 PureLink Viral RNA/DNA kit protocol, including DNase treatment, was followed for the  
153 remainder of RNA isolation procedure. q-RT-PCR was performed using the SuperScript III  
154 Platinum One-Step q-RT-PCR Kit (Invitrogen) following the manufacturer's guidelines. Primers  
155 targeting the RVFV L segment include: RVFV-2912Fwd 5' TGAAAATTCCTGAGACACATGG  
156 3' and RVFV-2912Rev 5' ACTTCCTTGCATCATCTGATG 3'. Taqman probe (RVFV-2950  
157 Probe 5' CAATGTAA GGGGCCTGTGTGGACTTGTG 3') were labeled at the 5'-end with the  
158 reporter molecule 6-carboxyfluorescein (6-FAM) and quenched internally at a modified "T"

159 residue with BHQ1 (Black Hole Quencher), with a modified 3' - end to prevent probe extension by  
160 Taq polymerase (19). Thermocycling parameters include the following: reverse transcription, 50°C  
161 for 30 minutes; Taq polymerase inhibitor activation, 95°C for 2 minutes; PCR amplification, 95°C  
162 for 15 seconds and 55°C for 30 seconds (40 cycles). Semi-quantitation of virus was determined by  
163 comparing CT values from unknown samples to CT values from the in-house developed ZH501  
164 RVFV RNA standards based on PFU equivalents.

### 165 *In situ infection of human tissue*

166 Human placental tissue isolated within the second trimester (14-23 weeks) from elective  
167 terminations of normal (non-genetically abnormal) pregnancies was obtained from the University  
168 of Pittsburgh Health Sciences Tissue Bank through an honest broker system after approval from  
169 the University of Pittsburgh Institutional Review Board and in accordance with the University of  
170 Pittsburgh anatomical tissue procurement guidelines.

171 Amnion (fetal membrane), decidua (maternal tissue), and chorionic villi were separated  
172 from whole placental tissue and cut to 1 cm x 1 cm sections. Each tissue section was placed in a  
173 well of a 24-well plate (Corning) and inoculated with the following doses of RVFV strain ZH501,  
174 in duplicate:  $1.6 \times 10^7$  pfu (n=2 per donor),  $3.0 \times 10^6$  pfu,  $3.0 \times 10^5$  pfu,  $3.0 \times 10^4$  pfu, or  $3.0 \times 10^3$   
175 pfu (n=4 per donor unless otherwise stated). Five hundred microliters of virus diluted in D2 media  
176 was added to each tissue and incubated in a 37°C incubator for 1 hour for viral adsorption. The  
177 inoculum was removed, washed twice with PBS, then replaced with 1 mL of complete growth  
178 media (DMEM/F12, 10% FBS, 1% penicillin-streptomycin, amphotericin B). To generate a viral  
179 growth curve, 50 µL was collected from each tissue every twelve hours for forty-eight hours and  
180 analyzed by q-RT-PCR. Forty-eight hours post-infection, all supernatant was collected, and tissues



181 were washed two times with PBS then fixed in 4% PFA for 24 hours for fluorescent microscopy  
182 imaging. Tissues or supernatant were analyzed in quadruplets; two of these tissues were processed  
183 for fluorescent microscopy.

#### 184 *Fluorescent Microscopy*

185 Human tissue was fixed in 4% paraformaldehyde (PFA) for 24 hours at 4°C, washed in 1x  
186 PBS, and then permeabilized with 0.25% Triton X-100 in 1x PBS for 30 minutes at room  
187 temperature with gentle agitation. Tissue was washed and then incubated with antibodies to double  
188 stranded RNA (recombinant J2, as described previously (20), rabbit anti-cytokeratin-19 (Abcam),  
189 and counterstained with actin (using Alexa Fluor conjugated Phalloidin) for 1 hour at room  
190 temperature. Following washing with 1x PBS, tissue was incubated with Alexa Fluor conjugated  
191 secondary antibodies (Invitrogen), washed, and then mounted with Vectashield (Vector  
192 Laboratories) containing 4',6-diamidino-2-phenylindole (DAPI). Images were captured using a  
193 Zeiss LSM 710 inverted laser scanning confocal microscope and contrast adjusted in Photoshop.  
194 Quantification of the extent of RVFV infection was performed using Fiji (NIH). Regions of interest  
195 (ROIs) of the syncytium from four different donors were defined using Fiji and the extent of RVFV  
196 infection (as assessed by the relative fluorescent units; RFU) was quantified. In total, eleven villi  
197 were quantified from uninfected controls and sixteen villi were quantified from RVFV infected  
198 tissue.

#### 199 *Histology*

200 For fixation of tissues and inactivation of virus, tissues were submerged for 24 hours in 4%  
201 paraformaldehyde (PFA) at 4°C. Prior to removal from the BSL-3 laboratory, the 4% PFA was  
202 replaced with fresh 4% PFA. In the BSL-2 laboratory, 4% PFA was removed and washed from

203 tissue with 1x PBS then submerged in PBS and stored at 4°C until processed further. Tissues were  
204 paraffin embedded and sections were cut onto slides following standard histological processes by  
205 the University of Pittsburgh McGowan Institute Histology Core.

206 Whole pups were submerged in 4% PFA for 24 hours. To ensure complete inactivation,  
207 pups were cut in half laterally, then exposed to 4% PFA for another 24 hours prior to removal from  
208 the BSL-3 laboratory. Half pups were further cut into whole head and abdomen sections in the  
209 BSL-2 laboratory prior to embedding in paraffin and cut onto slides.

210 Slides were deparaffinized using an alcohol rehydration series then stained following  
211 standard hematoxylin and eosin staining procedures. For immunohistochemistry, fixed slides were  
212 deparaffinized using an alcohol rehydration series and boiled in 10mM citric acid buffer pH 6.0 to  
213 unmask antigen binding epitopes. Primary antibody was IBT Bioservices Rift Valley Fever MP12  
214 Antibody (Catalog# 04-001); secondary antibody was Vector Laboratories Biotinylated Horse  
215 Anti-Rabbit (H+L) (Catalog# BA-1000). Chromogen staining for visualization was carried out  
216 using the Vector Laboratories Vector Blue Alkaline Phosphatase Substrate kit according to  
217 manufacturer's instructions. Slides were imaged using the Nikon 90i Eclipse epifluorescent  
218 microscope provided by the University of Pittsburgh Center for Biologic Imaging.

## 219 *Statistics*

220 Statistical analysis was performed using Graphpad Prism 7.0. Survival of pup and dams  
221 was compared using Mann Whitney-U test. Growth curve of pups 7 and 8 from dam 4 was  
222 calculated using linear regression modeling. Intensity of RVFV immunostaining in uninfected and  
223 infected human placental tissue was compared using a t-test.

## 224 **Results**

### 225 Susceptibility of late-gestation pregnant Sprague-Dawley rats to RVFV disease and death

226 Rats develop severe disease after RVFV infection, similar to that observed in domesticated  
227 livestock and humans (21,22). We have previously used rats to study different disease outcomes  
228 resulting from RVFV infection (21,23). Although there are significant morphologic differences  
229 between the placentas of humans and rodents, rats are often used to study placental development,  
230 embryogenesis, embryotoxicity, and vaccine teratogenicity during pregnancy (24-29). The fully  
231 intact placenta forms a physical barrier between the mother and fetus, facilitates nutrient exchange,  
232 and protects the developing fetus from microbial invasion. The gestational period for rats is 22  
233 days, and by embryonic day 14 (E14), the placenta is fully formed with deep trophoblast invasion  
234 within the uterine wall (24).

235 For these studies, time-mated Sprague-Dawley (SD) rats at E14 were infected with the  
236 pathogenic ZH501 strain of RVFV by subcutaneous injection (s.c.) in the hind flank (Fig. 1A). As  
237 controls, age-matched, non-pregnant rats were similarly infected. Some rats developed severe  
238 disease as a result of infection, and in these cases, euthanasia endpoint criteria were met within 2-  
239 6 days after infection in both pregnant and non-pregnant groups (Fig. 1B). Rats that survived  
240 infection had few signs of disease and delivered pups on E22. Surviving pups were not handled  
241 until 5 days after delivery, after which they were weighed daily. Surviving dams and pups were  
242 euthanized at the end of the study (neonatal age of 10 days; 18 days post-infection (dpi)) (Fig. 1A).

243 The pregnant rats were more susceptible to death after infection than their non-pregnant  
244 counterparts (Fig. 1B). Non-pregnant rats survived infection despite exposure to high doses of  
245 RVFV (only 2 out of 22 died; 9%), whereas 57% of pregnant rats died (16 out of 28) when exposed

246 to even low doses of RVFV ( $p = 0.0008$ ). Within the pregnant rat cohort, there was no association  
247 between death after infection and the administered dose ( $p = 0.321$ ).

#### 248 Reproductive tissues are targets of RVFV infection in pregnant and non-pregnant rats

249 The distribution of virus throughout the tissues was measured by q-RT-PCR and/or viral  
250 plaque assay (VPA) in pregnant rats that succumbed to lethal disease (2-6 dpi) (Fig. 1C), pregnant  
251 rats that survived (18 dpi; Fig. 1D), and their non-pregnant counterparts (16 dpi for survivors;  
252 Suppl. Fig. 1A-B). Infectious virus was widely distributed throughout the animals that succumbed,  
253 regardless of pregnancy status. In surviving animals at 18 dpi, infectious viral burden was  
254 significantly reduced in both pregnant and non-pregnant rats (data not shown). Viral RNA,  
255 however, remained widely distributed in the survivors at the end of the study, 18 dpi (Fig. 1D). As  
256 expected because RVFV is a hepatotropic virus, the liver contained large amounts of infectious  
257 virus in lethally-infected rats (pregnant and non-pregnant; Fig. 1C & Suppl. Fig. 1B) and high  
258 amounts of viral RNA remained in the liver of survivors at 18 dpi and 16 dpi, respectively (Fig 1D  
259 & Suppl. Fig. 1A).

260 Placental samples were available from the pregnant rats that succumbed to disease and a  
261 few that survived (most surviving rats consumed the placenta at the time of delivery and were not  
262 available for analysis) (Fig. 1E). The placenta contained high levels of infectious virus measured  
263 by plaque assay regardless of the time post-infection. Even the placentas obtained from the  
264 surviving rats on the day of delivery contained extraordinary amounts of infectious virus, with one  
265 animal having over  $10^9$  pfu/ml.

266 In addition to the placenta, the uterus, ovary, and amniotic sac contained infectious virus  
267 in the lethally-infected rats (Fig. 1C), and viral RNA persisted in these tissues in survivors (Fig.

268 1D). Virus was also found in the mammary glands (4/5 rats had detectable vRNA; 1 had infectious  
269 virus), indicating vertical transmission of RVFV from dam to pup could possibly occur through  
270 lactation. There is indeed a concern that consumption of raw milk from goats and cattle may be a  
271 risk for human infection with RVFV (30).

272 Compared to controls, histology sections of livers from lethally-infected pregnant (Fig. 2)  
273 and non-pregnant (Suppl. Fig. 1C) rats displayed a reproducible pattern of tissue injury that  
274 included widespread sinusoidal congestion, multifocal recent hemorrhage, massive hepatocyte  
275 necrosis, and acute inflammation. These are classic histological findings in animals infected with  
276 RVFV (31). In addition, the livers of infected rats had high levels of RVFV-antigen (Suppl. Fig.  
277 1 D-E). Altogether, our data suggest that both pregnant and non-pregnant rats succumb to  
278 infection following massive liver necrosis, although pregnant rats are more susceptible to  
279 developing disease after exposure to low levels of virus compared to non-pregnant rats (Fig. 1B).

280 The placentas from lethally and sub-lethally infected dams displayed a reproducible pattern  
281 of tissue injury that included multifocal necrosis and recent hemorrhage in the decidua and  
282 trophospongiosum; vascular congestion and massive necrosis of parenchymal cells within the  
283 labyrinth; and an acute intravascular and perivascular inflammatory infiltrate associated with  
284 intraplacental arteries (Fig 2A,B). Also seen was a discernable increase in circulating nucleated  
285 red blood cells (nRBCs).

286 Within lethally-infected dams, necrotic lesions were found within the uterus (Fig. 2A).  
287 Several pregnant dams that survived infection had subserosal nodules within the myometrium of  
288 the uterus that showed evidence of liquefactive necrosis, acute inflammation, and calcification.  
289 Despite the presence of viral RNA and infectious RVFV within the ovaries of both non-pregnant

290 (Suppl. Fig. 1A-B) and pregnant (Fig. 1C-D) RVFV-infected rats, reproducible histopathological  
291 changes were not observed.

292 RVFV vRNA was also found in the testes of infected male Lewis rats (Sup. Fig. 2). The  
293 levels of RVFV viral RNA and infectious particles found here in the uterus, ovary, placenta,  
294 amniotic sac, mammary glands, and testes, as well as the histological damage in certain tissues,  
295 demonstrates that RVFV has a previously unappreciated preference for targeting the reproductive  
296 tissues.

297 Direct vertical transmission of RVFV to pups during late-gestation results in pup deformity and  
298 demise

299 Within the pregnant dams that succumbed to RVFV infection at 2-6 dpi, virus was  
300 widespread throughout various tissues, corroborating the pantropic nature of RVFV (Fig. 1C).  
301 Within the corresponding pups from these dams that died, q-RT-PCR of the peritoneal cavity or  
302 brains also detected high levels of viral RNA (Fig. 3A). Vertical transmission occurred while the  
303 pups were *in utero*, as the dams were euthanized prior to delivery.

304 Because most humans develop non-lethal febrile illness when infected with RVFV, we  
305 were interested in the outcome of the pups from dams that survived infection with few to no clinical  
306 signs. Remarkably, many of the pups born from these surviving, clinically-normal dams were dead  
307 at delivery or shortly thereafter (Fig. 3B). Of ten pregnant dams that survived infection and reached  
308 full-term (E22), all gave birth to at least one pup that died either due to infection or consumption  
309 on the days following delivery. An additional dam survived to full-term; however, all pups were  
310 consumed by this dam and were unable to be recorded for analysis.

311           The eleven infected dams gave birth to a total of 111 pups, 39 of which survived (35.1%).  
312   In comparison, of the eight uninfected control dams, 66 of 88 (75.0%) pups survived to the end of  
313   the study ( $p < 0.0001$ ). Dams are known to eat their young due to stress (such as the laboratorian  
314   disturbing the pups to weigh them after delivery) or if they notice abnormalities (17,18). Some of  
315   the uninfected dams consumed their pups during this study, so the survival rate of the pups from  
316   uninfected dams can be considered the baseline for these experimental conditions. The average  
317   survival rate of pups per litter delivered by infected dams was 27.2%, whereas uninfected rats were  
318   2.45-times more likely to survive (66.8%;  $p = 0.02$ ). Outcomes from 4 specific dam cases are  
319   presented and discussed in the following section.

320           Overall, we detected very high levels of viral RNA ( $10^6$ - $10^7$  pfu/mL eq.) in the peritoneal  
321   cavity of still-born pups birthed by dams that had no apparent clinical disease (Fig. 3B). It is quite  
322   striking that the virus was vertically transmitted and replicated to high levels in the pups, while  
323   causing no clinical disease in the dam herself. Viral RNA was also detected in the brains of pups  
324   from both surviving and lethally-infected dams (Fig. 3A,B). Fetal resorption is characteristic of  
325   vertical transmission in animals infected with viruses such as Zika virus (32) and vesicular  
326   stomatitis virus (33). Evidence of fetal resorption occurred in three lethally-infected dams exposed  
327   to RVFV during late-stage gestation (Fig. 3C & Suppl. Fig. 3).

328           H&E sections of whole pups from lethally-infected dams showed significant liver damage  
329   (massive parenchymal necrosis, vascular congestion and areas of recent hemorrhage) (Fig. 3D).  
330   Pups also displayed altered intestinal structure compared to pups from uninfected dams.

331           During the late stages of pregnancy, RVFV is directly transmitted to the developing pups  
332   resulting in increased rates of death and tissue damage. Interestingly, this is not an all-or-nothing

333 phenomenon within individual litters, as we found that physiological changes and survival varied  
334 within the same litter. To illustrate this, four selected cases are described below.

### 335 *Description of individual dam cases*

336 Dam 1 reached full-term gestation with no apparent clinical signs nor significant liver  
337 damage, yet she still died giving birth (8 dpi). Dam 1 delivered eleven pups that were all dead upon  
338 delivery, with 2 pups remaining within the uterus at the time of her demise (Fig. 4A). Like other  
339 RVFV-infected dams, viral RNA was widespread throughout the dam's tissues (Fig. 4B). Because  
340 this dam died during delivery, the placenta was available to directly compare the virus burden of  
341 the placenta to other maternal tissues harvested at the same time. In the other cases discussed  
342 below, the dams ate placentas after birth, so they were unavailable to sample. Strikingly, at the  
343 time of death, dam 1 had  $10^7$  pfu/mL of virus in the placenta, which is 4-logs more viral RNA than  
344 the liver and spleen, the primary targets of the virus (Fig. 4B). In addition, the uterus and ovary  
345 had about 1-log more viral RNA than the liver and spleen, demonstrating a preference for RVFV  
346 to replicate within reproductive tissues.

347 The stillborn pups from dam 1 had apparent gross abnormalities (small, rounded head and  
348 grey discoloration) and variable size (1.5 – 3 cm) compared to uninfected pups (5 cm; Fig. 4A).  
349 Nine of the eleven pups (82%) had abnormally shaped heads compared to uninfected pups. Pup 6  
350 and 7 likely died earlier *in utero*, as indicated by their small size and apparent decomposition; both  
351 of their heads were disproportionately large due to early gestational demise. While the other pups  
352 were larger than pups 6 and 7, none of them were normal in size, and they were all born deceased.  
353 The pups had very high levels of viral RNA ( $10^6$ – $10^7$  pfu/mL eq., irrespective of pup size; Fig.  
354 4C). Less infectious virus was recovered from the pups compared to viral RNA (Fig. 4C,D), likely



355 due to the inability to preserve tissue immediately after death because pups succumb to infection  
356 *in utero* or shortly after delivery. This trend is observed for all representative dams (Figs. 4-5),  
357 otherwise RVFV infectivity correlates very closely with q-RT-PCR results as seen in Fig. 1.

358 Dam 2 survived infection with no apparent clinical signs. Viral RNA was still detected  
359 throughout the dam at 18 dpi, with the highest burden in reproductive tissues and the brain (Fig.  
360 4F). At E22, she delivered seven pups; five were born dead and two were alive. Both living pups  
361 were consumed by the dam within a day of birth. Dams periodically eat their young due to stress  
362 or if they notice abnormalities in their pups (17,18). The pups shown in Fig. 4E are around 5 cm in  
363 length, which is normal for full-gestation pups. Several have dark colored bodies likely signifying  
364 decomposing tissue and/or blood congealment. Smaller, rounded heads without a pointed snout  
365 were observed in three of the seven pups (pups 2, 3, and 5). Despite pup 1 having similar  
366 physiological features and length as a normal pup delivered from an uninfected mother (Fig. 4E),  
367 viral RNA and infectious virus was highest in this pup compared to its littermates that had more  
368 severe gross anatomical abnormalities (Figs. 4G-H). This may be due to more advanced  
369 decomposition setting in pups 2, 3, and 5 that affected virus infectivity.

370 In another case, dam 3 also survived infection with no clinical signs of disease and had  
371 widespread viral RNA in tissues at 18 dpi (Fig. 5B). She delivered ten pups at full-term (E22); six  
372 pups were born deceased and four were alive. Two of the living pups survived until the scheduled  
373 euthanasia date (18 dpi; 10 days neonate), whereas the other two were consumed by the dam within  
374 two days post-delivery. Pups 1 and 2 from dam 3 were relatively normal in appearance; however  
375 they were born deceased and displayed the highest viral RNA (Fig. 5C) and infectious virus (Fig.  
376 5D) burden compared to littermates with physiological abnormalities; this could be due to the more  
377 recent demise of pups 1 and 2 which preserved infectious virus until tissue was collected. The pups

378 who die earlier *in utero* likely have less infectious virus due to decomposition which affects virus  
379 viability. Despite pups 7 and 8 surviving until planned euthanasia at neonatal age of 10 days with  
380 no signs of disease or gross abnormalities, viral RNA was still detected in the peritoneal cavity of  
381 these pups, although infectious virus was not found (Figs. 5C-D). Pup 7 weighed significantly less  
382 than its littermate, and both had similar growth rates (slope = 1.88 for pup 7 and 2.26 for pup 8; p  
383 = 0.14) after birth Fig. 5E). It is unclear if this is natural variation in pup size or an effect of viral  
384 infection *in utero*.

385 Finally, dam 4 had no signs of clinical disease and delivered a total of nine deceased pups  
386 at full-term (Fig. 5F). Multiple pups were found encapsulated in an amniotic sac and/or still  
387 connected to a placenta (Fig. 5J). Placenta collected the day of delivery had high levels of viral  
388 RNA ( $10^5$  pfu/ml eq.); the viral RNA levels in the placenta were similar to that found in the pups,  
389 regardless of pup size (Figs. 4H,I). Seven out of nine pups (78%) had abnormally shaped heads  
390 compared to uninfected pups. The pups had gross abnormalities and varied in color from pink to  
391 gray to black. Infectious virus was detected in five out of nine pups (Fig. 4I). The smallest pup  
392 (pup 11), measured at about 2.2 cm, while the largest pup from the litter was about 4.1 cm in  
393 length; all pups from this litter were still smaller than pups delivered from uninfected dams  
394 (typically 5 cm).

395 The four dams highlighted above, despite being asymptomatic, all had liquefactive  
396 myonecrosis within the uterus (Fig. 2). The placenta also had striking abnormalities, including  
397 inflammation, cell necrosis, and hemorrhage in the decidua and villous structures (Fig 2A-B).

398 Vertical transmission of RVFV in an early-gestation pregnant rat

399 To examine the potential for vertical transmission of RVFV prior to the development of a  
400 fully formed placenta, an early-gestation (E5) Sprague Dawley dam was infected with  $1.5 \times 10^5$   
401 pfu of RVFV along with an uninfected, age-matched, pregnant dam as a control. At seven days  
402 post-infection, corresponding to E13, neither dam had clinical signs of disease and both dams  
403 underwent planned euthanasia (Suppl. Fig. 4A). The observed virus distribution in the early-  
404 gestation pregnant rat resembled that of the late-gestation pregnant rats (Suppl Fig. 4B and Fig. 1).  
405 Infectious virus was detected in the cervical lymph node, spleen, liver and placenta, with the  
406 placenta containing 3-logs more infectious virus than the spleen ( $10^6$  vs  $10^3$  pfu/mL, respectively;  
407 Suppl. Fig. 4B). Due to the small size of each embryo at this gestational age, embryonic tissue  
408 from the entire litter was pooled and analyzed for the presence of viral RNA and infectious  
409 particles (Suppl. Fig. 4C). Pooled embryos had 2-log more viral RNA and infectious virus than the  
410 spleen of the dam ( $10^{6.5}$  vs  $10^3$  pfu/mL respectively).

411 At the time of euthanasia, the uninfected dam had a healthy uterus containing fourteen  
412 embryos, all with similar sizes, shapes, and a translucent, pale-yellow coloring. Of the sixteen  
413 embryos of the infected dam, four (25%) were red in color (Suppl. Fig. 4D) instead of the pale-  
414 yellow coloring observed in the remaining twelve embryos and embryos of the uninfected control  
415 (Suppl. Fig. 4D, left). Three embryos were smaller than the embryos from the rest of the litter.  
416 They lacked amniotic fluid and were palpably dense and hard in appearance (Suppl Fig. 4D;  
417 embryos 4-6); embryos 4 and 5 were two of the four red in color. The red coloring and rigid  
418 appearance and structure of embryos from infected dams suggests early hemorrhaging and/or  
419 resorption of the embryos. These results show that RVFV is vertically transmitted to embryos of  
420 dams infected during early-gestation, with a preferential niche within the placental tissue.

421 Replication of RVFV in human placental tissue

422           Although two isolated cases of vertical transmission have been reported in humans from  
423 Africa and the Middle East (13,14) and a single study highlighted the potential of RVFV-infected  
424 women to be 4-times more likely to have a late miscarriage or stillbirth (15), the effect of RVFV  
425 infection on the developing human fetus is not known. To evaluate whether human fetal tissue is  
426 permissive to RVFV infection and replication, placental chorionic villi were obtained from healthy  
427 human donors undergoing elective termination at 16-23 weeks of gestation (second trimester).  
428 Tissues were inoculated *in vitro* with RVFV, and explant supernatant was collected every 12 hours  
429 for measurement of viral replication. Similar viral growth kinetics was seen in chorionic villi from  
430 2 different donors (Fig. 6A); 2-3 log increase in virus production was detected between 12 and 36  
431 hours post-infection.

432           To identify the cell type(s) targeted by RVFV in placental villi, we performed  
433 immunostaining for double-stranded RNA as described (20). Viral replication, as assessed by the  
434 production of dsRNA, was evident in the villi, with replication observed in both the syncytial layer  
435 and the subsyncytial layers within mononuclear cytotrophoblasts (Fig. 6B). Significantly higher  
436 levels of dsRNA signal was detected in infected villi from four different donors compared to  
437 uninfected villi from the same donors (Fig. 6C). These data suggest that RVFV exhibits tropism  
438 for human placental tissue and can replicate to some degree in syncytiotrophoblasts which are  
439 known to resist many viruses (34).

## 440 **Discussion**

441           Viral infections in pregnant women can have adverse effects on both the mother and the  
442 developing fetus. Pregnant women are likely to have more severe pathology, more serious  
443 complications, and an increased risk of death compared to non-pregnant women (35,36). For both

444 seasonal and pandemic influenza, pregnant women are more susceptible to developing severe  
445 complications requiring hospitalization (37,38). Other emerging viruses, like Ebola and Lassa, are  
446 also more severe or deadly in pregnant women (39,40). Here, we found pregnant rats to be more  
447 susceptible to severe disease and death after RVFV infection than their non-pregnant counterparts.  
448 Necrosis of the liver was characteristic of disease in both pregnant and non-pregnant rats,  
449 indicating that pregnancy did not alter the disease presentation, but rather made the pregnant  
450 animals more susceptible to severe disease overall.

451         A 1987 study of pregnant women in Mozambique showed that women with miscarriage or  
452 stillbirth had the same prevalence of RVFV-specific IgG antibodies as women with normal  
453 deliveries (41). However, detection of IgG antibodies is indicative of past exposure to RVFV and  
454 not necessarily acute infection during pregnancy. In a more recent cross-sectional study in Sudan,  
455 there was a significant association between acute RVFV infection during pregnancy and  
456 miscarriage (15). Of the women with confirmed RVFV infections and disease during pregnancy,  
457 54% had miscarriage compared to 12% in uninfected women. Acute RVFV infection was an  
458 independent predictor of miscarriage (odds ratio of 7.4); all of these miscarriages occurred in the  
459 2<sup>nd</sup> and 3<sup>rd</sup> trimesters (15). While this is only one study, it strongly implicates RVFV infection as  
460 a causative agent of miscarriage in late-gestation. Miscarriage earlier in pregnancy due to RVF  
461 may also occur but remain underreported.

462         Two cases of vertical transmission of RVFV were documented in Saudi Arabia (2000) and  
463 Sudan (2007) (13,14). In both cases, onset of RVF-like illness in the mothers occurred around 37-  
464 38 weeks of gestation. In the two weeks prior to illness in the Saudi woman, 6 family members  
465 developed RVF-like illness and 1 died of confirmed RVF. The woman developed RVF-like  
466 symptoms 4 days prior to delivery of a full-term infant at home. On the second day of life, the

467 infant was hospitalized with respiratory distress, jaundice, and lethargy. He died 6 days after  
468 admission with hemorrhagic signs and an enlarged liver. In the Sudanese patient, labor  
469 commenced within 10 days of illness onset, and an infant was born with skin rash, palpable liver  
470 and spleen, and an Apgar score of 5. Samples from the mother and cord blood tested positive for  
471 RVFV IgM. The outcome of this infant is not known. Taken together, these data suggest that acute  
472 RVFV infection is associated with adverse pregnancy outcomes, specifically vertical transmission  
473 during the second and third trimesters.

474         To our knowledge, this is the first study to discover the degree to which RVFV targets  
475 reproductive tissues and causes catastrophic pathology. The ovaries, uterus, and placenta are  
476 previously unrecognized sites of virus replication in both pregnant and non-pregnant  
477 immunocompetent animals. A previous study in mice found virus-infected macrophages within  
478 the stroma of ovaries from immunodeficient animals infected with an attenuated strain of RVFV  
479 (42). Here, we not only found high levels of infectious virus and viral RNA in the reproductive  
480 tissues, but the placenta and uterus displayed histologic changes associated with viral infection.  
481 Liquefactive necrosis within the uterus of the four dams profiled was striking. Uterine cell death  
482 may be a contributing factor to premature placental detachment and intrauterine fetal death within  
483 RVFV infected dams. Additionally, the tissues with the highest viral burden were the liver and  
484 placenta of lethally and sub lethally-infected pregnant dams. Similarities in physiological functions  
485 of these two organs and the high viral load and pathology (massive vascular congestion, recent  
486 hemorrhage, cell necrosis, and acute inflammation) observed during infection suggest similar  
487 mechanism of disease and infection. Further studies should be performed to understand the onset  
488 and progression to fetal demise and elucidate commonalities between the liver and placental  
489 structure that accommodates comparable pathology after RVFV infection.

490           The most alarming and arresting finding from our study was the delivery of dead pups from  
491 dams that survived RVFV infection, appeared otherwise clinically normal, and gave birth at  
492 normal gestation length. The pups displayed physical abnormalities that resembled *hydrops fetalis*,  
493 which is an abnormal accumulation of fluid in the fetus. *Hydrops fetalis* is seen in RVFV-infected  
494 livestock (43) and has been noted as a prominent occurrence in pregnant women infected with  
495 parvovirus and Zika (44-47). Most humans infected with RVFV develop mild febrile disease, and  
496 our study suggests that mild infection of pregnant women may still have devastating impacts on  
497 the developing fetus.

498           The data presented also demonstrates the heterogeneous survival and physiological  
499 outcomes of pups delivered by RVFV-infected dams. Some dams gave birth to both live and dead  
500 pups, and within the dams that delivered only dead pups, there was variation in the size and gross  
501 abnormalities seen within pups from the same litter, indicating that infection, growth restriction,  
502 developmental abnormalities, and/or death did not occur simultaneously or with the same outcome.  
503 Further studies will determine the specific developmental effects that RVFV infection *in utero* has  
504 on the developing fetus.

505           Our work in pregnant rats pointed to the severe teratogenic effects of RVFV. However,  
506 given that the human and rodent placenta differ at both the morphologic and cellular levels, which  
507 may influence vertical transmission, we also performed studies in human tissue isolated from mid-  
508 gestation. Importantly, this gestational age represents a stage in which RVFV-induced fetal death has  
509 been observed in humans (15). Remarkably, our studies revealed that RVFV can replicate to a high  
510 degree in human chorionic villi, which resist infection by other viruses, including ZIKV (20,48,49).  
511 Immunofluorescence analysis showed that viral replication occurred in both the outermost  
512 syncytial layer as well as in subsyncytial layers such as cytotrophoblasts. Of note, we have shown

513 previously that human placental syncytiotrophoblasts are highly resistant to viral infections  
514 through their constitutive release of antiviral molecules including type III interferons (IFNs)  
515 (48,50,51). We have also shown that the syncytium expresses high levels of interferon stimulated  
516 genes (ISGs) under basal states, suggesting that these IFNs protect the syncytium from viral  
517 infections in an autocrine manner. Our data thus suggest that RVFV is insensitive to placental-  
518 derived type III IFNs, perhaps through mechanisms that suppress the activity of ISGs or the  
519 response of the syncytium to type III IFNs. Future studies aimed at defining these mechanisms  
520 will be critical to design therapeutic approaches to reduce the RVFV vertical transmission.

521 Ruminants have multicotyledonary, epitheliochorial placentas while humans and rodents  
522 both have discoid hemochorial placentas (24,52). Despite some similarities, the placental structure  
523 differs between rats and humans in many ways. Humans have a placental-fetal interface consisting  
524 of villous trophoblasts with extravillous trophoblastic cells, while rats have a labyrinth zone with  
525 invasive trophoblasts (24). Although livestock have different placental structures than rodents and  
526 humans, our data suggests that the mechanism by which RVFV is vertically transmitted can be  
527 shared amongst eutherian mammals, with specific tropism for fetal-derived placental cells. Our  
528 study thus provides a framework for understanding vertical transmission of RVFV that is  
529 applicable to both a veterinary and human context. Comparison of these models could also explain  
530 the potentially disparate rate of miscarriages between livestock and humans.

531 While the abortogenic effect of RVFV in pregnant livestock is historically well-known, the  
532 mechanisms underlying these observations are not. The teratogenic potential of live-attenuated  
533 vaccine candidates are assessed in pregnant sheep, despite the lack of data on the basic mechanism  
534 of vertical transmission of wild-type virus (53,54). Our findings here are noteworthy because this  
535 is the first time direct vertical transmission through the placenta has been demonstrated in a species



536 other than livestock. Because the ability to test vaccines in livestock is expensive and limited to  
537 only a few facilities able to perform these types of experiments, evaluation of teratogenicity in rats  
538 would be very useful. Vaccine candidates could be screened for adverse effects in pregnant rats  
539 prior to evaluation in pregnant ewes.

540         This study provides insights into the teratogenic potential of RVF in humans and highlights  
541 the need for more epidemiological data from human outbreaks to understand the effect of acute  
542 RVFV infection in pregnant women. The data that exist, combined with what is known to occur  
543 in livestock and our work presented here, all point to the high likelihood that RVFV can have  
544 damaging effects on fetuses in humans. Emergence of RVFV beyond its current locations due to  
545 changing climate, altered mosquito habitats, and/or accidental introduction would present a  
546 significant risk to pregnant women. Future work aimed at defining teratogenic potential of RVF in  
547 humans is critical in order to design strategies to reduce the potential for fetal disease in pregnant  
548 women, who may themselves display few clinical symptoms.

#### 549 **Acknowledgements**

550 The authors would like to express sincere gratitude for the technical assistance provided by Aaron  
551 Walters, advice on experimental design from Jeneveve Lundy and Reagan Walker, rat art provided  
552 by Henry Ma, and study coordination by Stacey Barrick. We also thank the Center for Biologic  
553 Imaging and the McGowan Center for Regenerative Medicine for histology support. This work  
554 was partially supported by the University of Pittsburgh Center for Vaccine Research (A.L.H), NIH  
555 R01-NS101100-01A1 (A.L.H), R21-NS088326 (A.L.H), NIH R01-AI081759 (C.B.C.), R01-  
556 HD075665 (C.B.C.), a Burroughs Wellcome Investigators in the Pathogenesis of Infectious  
557 Disease Award (C.B.C), and the Children's Hospital of Pittsburgh of the UPMC Health System

558 (C.B.C.). The authors would also like to acknowledge the Tissue and Research Pathology  
559 Services/Health Sciences Tissue Bank, which receives funding from P30CA047904.

## 560 **Author Contributions**

561 C.M.M, C.B.C, and A.L.H conceived the study and designed the experiments; C.M.M., N.A.,  
562 D.A.B., J.R.A, and M.R.K. performed experimental work; J.F.B contributed pathology expertise  
563 and interpretation; C.M.M., C.B.C, and A.L.H. analyzed and interpreted the data; C.M.M. and  
564 A.L.H wrote the manuscript.

565

## 566 **Figure legends**

567 **Figure 1: Pregnant rats are more susceptible to death after RVFV infection, with virus**  
568 **homing to the liver and placenta.** (A) Experimental design for E14 SD rats infected with RVFV.  
569 After delivery at E22, dams and pups were not disturbed until 5 days post-delivery (13 dpi).  
570 Euthanasia of surviving dams and pups occurred 18 dpi (10 days post-delivery). (B) Survival of  
571 RVFV-infected pregnant dams and non-pregnant SD rats (n=3-6 per dose). The shaded area  
572 represents the 2- to 6- day clinical window when lethally-infected pregnant rats were euthanized  
573 due to severe disease. (C) vRNA (q-RT-PCR; left) and infectious virus (VPA; right) in tissues from  
574 pregnant rats that succumbed (red squares; n=17) between 2-6 dpi. (D) vRNA in tissue samples  
575 from pregnant rats that survived infection (blue circles; n=11) and were euthanized 18 dpi. Placenta  
576 samples (open blue circles) were obtained at day of delivery (8 dpi). (E) Infectious virus measured  
577 by VPA in placental samples obtained from lethally infected (red squares) and surviving (blue  
578 circles) rats at the indicated day after infection. CLN; cervical lymph node. Dashed horizontal lines

579 represent the limits of detection (LOD) of the q-RT-PCR (0.1 PFU equivalent/mL) and VPA (50  
580 PFU). ND, not detected (below the LOD).

581 **Figure 2: RVFV causes pathology within the liver, uterus and placenta of pregnant dams.**

582 H&E staining within the indicated tissues. (A) 20x images of liver, uterus, and placenta. (B) 60x  
583 images of placenta. Blue, white, yellow, orange, or green arrow heads highlight evidence of  
584 hemorrhaging, necrosis, vascular/perivascular congestion, calcification, or nucleated red blood  
585 cells, respectively.

586

587 **Figure 3: Infection of pregnant dams results in direct transmission of RVFV to the**

588 **peritoneum and brain of pups.** Pups delivered from (A) lethally-infected and (B) surviving  
589 pregnant rats were tested for vRNA within the peritoneal cavity (left) and brain (right). In (A), the  
590 x-axis represents the day the dams were euthanized due to severe disease. In (B), the x-axis  
591 represents the day post-delivery, with day 10 representing surviving pups euthanized at the end of  
592 the study. For both graphs, red square data points indicate pup demise and blue circle data points  
593 indicate pup survival. Open data points are pup brain tissues; all closed data points are pup  
594 peritoneal cavity. (C) Photographic evidence of fetal resorption within the uterus of one of three  
595 dams that succumbed to RVFV infection. (D) 10x images of whole pups were examined for  
596 histological changes. H&E staining of a whole pup from a dam that succumbed to infection (right)  
597 or a corresponding uninfected control rat (left) euthanized at the same day of gestation. Blue, white,  
598 and black arrow heads highlight evidence of hemorrhaging, necrosis, or altered intestinal structure,  
599 respectively.

600 **Figure 4: Vertical transmission of RVFV in 2 dams resulted in still-born pups with**

601 **physiological abnormalities and high viral titers.** (A-D) Dam 1 was inoculated with 175 PFU

602 and died giving birth at 8 dpi. Dam 1 delivered 13 still-born pups, with 2 remaining in the uterus.  
603 (A) Pictures of individual pups are shown as numbered. Uterus with pups 13 and 14 within birth  
604 canal post-demise. (B) vRNA within maternal tissue. (C) vRNA and (D) infectious virus within  
605 peritoneal cavity of indicated pups. The three pups not included in the graphs were used for other  
606 analyses. (E-H) Dam 2 was inoculated with 175 PFU and survived with no clinical signs of disease.  
607 Dam 2 delivered 7 pups to full-term; 5 were dead and 2 were alive but subsequently consumed by  
608 the dam (data not available). (E) Pictures of individual pups as labeled. A normal pup from an  
609 uninfected dam is shown for comparison. (F) vRNA within maternal tissue. (G) vRNA and (H)  
610 infectious virus within peritoneal cavity of indicated pups. For all graphs, red square data points  
611 indicate either dam or pup demise. Blue circle data points indicate dam or pup survival.

612 **Figure 5: Evidence of variable survival and physiological outcome of pups resulting from**  
613 **vertical transmission.** (A-E) Dam 3 was inoculated with 175 PFU and survived with no clinical  
614 signs of disease. Dam 3 delivered 10 pups to full-term; 6 dead and 4 alive. Two living pups were  
615 consumed by the dam within 2 days of birth (data not available). Two remaining pups survived to  
616 the end of the study (pups 7 and 8). (B) vRNA within maternal tissue. (C) vRNA and (D) infectious  
617 virus within peritoneal cavity of indicated pups. (E) Weight of surviving pups from dam 3 from  
618 days 5 to 10 neonate. Black or grey lines represent growth curve calculated by linear regression  
619 modeling of pup 7 or 8, respectively. (F-J) Dam 4 was inoculated with 1300 PFU and survived  
620 with no clinical signs of disease. Dam 4 delivered 9 still-born pups. (F) Pictures of individual pups  
621 as labeled. (G) vRNA within maternal tissue. (H) vRNA and (I) infectious virus within peritoneal  
622 cavity of indicated pups. (J) Cage of dam 4 as it was found on day of pup delivery (E22; 8 dpi).

623 **Figure 6: RVFV replicates in human placental tissue, even the highly resistant**  
624 **syncytiotrophoblasts within placenta villi.** Human chorionic villous tissue explants from donors

625 1 and 2 (A) were infected *in vitro* with RVFV at the indicated doses, then supernatant was harvested  
626 at 0, 12, 24, 36 and 48 hours post-infection for measurement of vRNA by q-RT-PCR. (B)  
627 Immunofluorescent microscopy images of villi infected with  $3 \times 10^6$  pfu RVFV for 48 hours.  
628 Uninfected control shown in left panels. DAPI (blue) stains DNA, J2 antibody (green) stains  
629 dsRNA of RVFV, cytokeratin 19 (red) stains epithelial cells, actin (purple) stains all cells. (C)  
630 Fluorescent dsRNA signal was quantified from 4 human donors. Data from uninfected (n=11) and  
631 infected (n=16) villi are shown with symbols stratified by donor (close circles, donor 1; open  
632 circles, donor 2; closed squares, donor 3; open squares, donor 4).

633 **Supplemental Figure 1: RVFV is present in the ovary and uterus of non-pregnant female**  
634 **rats.** Tissues from non-pregnant female rats shown in Fig. 1B were tested for vRNA by q-RT-PCR.  
635 Rats that (A) survived (n=15) or (B) succumbed (n=2) to infection. (C) H&E staining or (D,E)  
636 chromogen staining (blue) for RVFV antigen in the indicated tissues. (C,D) tissues from infected  
637 non-pregnant rats that survived (18 dpi) or succumbed to infection (2 dpi) . (E) RVFV antigen  
638 staining of liver from uninfected, lethal (4 dpi), or surviving pregnant dams (18 dpi; E14). Black  
639 or blue arrow heads highlight evidence of necrosis or hemorrhaging. 20x objective images.

640 **Supplemental Figure 2: Detection of RVFV in the testes of male rats.** Male Lewis rats were  
641 infected with RVFV (s.c.). Testes samples were taken from rats that succumbed to disease (red  
642 squares) and those that survived (blue circles) and tested for vRNA by q-RT-PCR.

643 **Supplemental Figure 3: RVFV infection leads to fetal resorption.** Photographic evidence of  
644 fetal resorption within the uterus of two of three dams who succumbed to RVFV infection.

645 **Supplemental Figure 4: Evidence of vertical transmission of RVFV in an early gestation (E5)**  
646 **pregnant dam, with high viral titers in the placenta.** (A) An early gestation (E5) dam was

647 infected with  $1.46 \times 10^5$  pfu (s.c.) and then euthanized at the pre-determined date of 7 dpi (E13)  
648 with no signs of disease. (B) vRNA (left) and infectious virus (right) within maternal tissue. (C)  
649 vRNA (left y-axis, solid grey bar) and infectious virus (right y-axis, open grey bar) within pooled  
650 embryos (16 embryos). (D) Photographic evidence of embryos from uninfected or infected dams  
651 at E13. Uterus containing embryos from an infected dam (right panel).

652

### 653 **References**

654

- 655 1. LaBeaud AD, Pfeil S, Muiruri S, Dahir S, Sutherland LJ, Traylor Z, Gildengorin G,  
656 Muchiri EM, Morrill J, Peters CJ, Hise AG, Kazura JW, King CH. 2015. Factors associated with  
657 severe human Rift Valley fever in Sangailu, Garissa County, Kenya. *PLoS neglected tropical*  
658 *diseases*. 9(3):e0003548. PMID: PMC4357470.
- 659 2. Anyangu AS, Gould LH, Sharif SK, Nguku PM, Omolo JO, Mutonga D, Rao CY,  
660 Lederman ER, Schnabel D, Paweska JT, Katz M, Hightower A, Njenga MK, Feikin DR,  
661 Breiman RF. 2010. Risk factors for severe Rift Valley fever infection in Kenya, 2007. *Am J Trop*  
662 *Med Hyg*. 83(2 Suppl):14-21. PMID: PMC2913492.
- 663 3. Smithburn KC, Haddock AJ, Lumsden WH. 1949. Rift Valley fever; transmission of the  
664 virus by mosquitoes. *Br J Exp Pathol*. 30(1):35-47. PMID: PMC2073112.
- 665 4. Linthicum KJ, Britch SC, Anyamba A. 2016. Rift Valley Fever: An Emerging Mosquito-  
666 Borne Disease. *Annu Rev Entomol*. 61:395-415.
- 667 5. Turell MJ, Britch SC, Aldridge RL, Kline DL, Boohene C, Linthicum KJ. 2013. Potential  
668 for mosquitoes (Diptera: Culicidae) from Florida to transmit Rift valley fever virus. *Journal of*  
669 *Medical Entomology*. 50(5):1111-7. PMID: PMCPMID: 24180117.
- 670 6. Brustolin M, Talavera S, Nunez A, Santamaria C, Rivas R, Pujol N, Valle M, Verdun M,  
671 Brun A, Pages N, Busquets N. 2017. Rift Valley fever virus and European mosquitoes: vector  
672 competence of *Culex pipiens* and *Stegomyia albopicta* (= *Aedes albopictus*). *Med Vet Entomol*.  
673 31(4):365-72.
- 674 7. Vloet RPM, Vogels CBF, Koenraadt CJM, Pijlman GP, Eiden M, Gonzales JL, van  
675 Keulen LJM, Wichgers Schreur PJ, Kortekaas J. 2017. Transmission of Rift Valley fever virus  
676 from European-breed lambs to *Culex pipiens* mosquitoes. *PLoS neglected tropical diseases*.  
677 11(12):e0006145. PMID: PMCPMC5760105.

- 678 8. World Health Organization. Annual review of diseases prioritized under the Research and  
679 Development Blueprint. 2017 January 24-25, 2017. [http://www.who.int/blueprint/what/research-](http://www.who.int/blueprint/what/research-development/2017-Prioritization-Long-Report.pdf?ua=1)  
680 [development/2017-Prioritization-Long-Report.pdf?ua=1](http://www.who.int/blueprint/what/research-development/2017-Prioritization-Long-Report.pdf?ua=1).
- 681 9. Easterday BC. 1965. Rift Valley Fever. *Advances in Veterinary Science*. 10:65-126.
- 682 10. Abd el-Rahim IH, Abd el-Hakim U, Hussein M. 1999. An epizootic of Rift Valley fever  
683 in Egypt in 1997. *Rev Sci Tech*. 18(3):741-8.
- 684 11. Davies FG, Martin V. *Recognizing Rift Valley Fever*. Rome: Food and Agriculture  
685 Organization of the United Nations, 2003.
- 686 12. Yedloutschnig RJ, Dardiri AH, Mebus CA, Walker JS. 1981. Abortion in vaccinated  
687 sheep and cattle after challenge with Rift Valley fever virus. *Vet Rec*. 109(17):383-4.
- 688 13. Adam I, Karsany MS. 2008. Case report: Rift valley fever with vertical transmission in a  
689 pregnant Sudanese woman. *Journal of Medical Virology*. 80(5):929-.
- 690 14. Arishi HM, Aqeel AY, Al Hazmi MM. 2006. Vertical transmission of fatal Rift Valley  
691 fever in a newborn. *Annals of tropical paediatrics*. 26(3):251-3.
- 692 15. Baudin M, Jumaa AM, Jomma HJE, Karsany MS, Bucht G, Naslund J, Ahlm C, Evander  
693 M, Mohamed N. 2016. Association of Rift Valley fever virus infection with miscarriage in  
694 Sudanese women: a cross-sectional study. *Lancet Glob Health*. 4(11):e864-e71.
- 695 16. Bird BH, Albarino CG, Nichol ST. 2007. Rift Valley fever virus lacking NSm proteins  
696 retains high virulence in vivo and may provide a model of human delayed onset neurologic  
697 disease. *Virology*. 362(1):10-5. PMID: 17412386.
- 698 17. Lane-Petter W. 1968. Cannibalism in rats and mice. *Proc R Soc Med*. 61(12):1295-6.  
699 PMID: PMC2211618.
- 700 18. Reynolds RD. 1981. Preventing maternal cannibalism in rats. *Science*. 213(4512):1146.
- 701 19. Bird BH, Bawiec DA, Ksiazek TG, Shoemaker TR, Nichol ST. 2007. Highly sensitive  
702 and broadly reactive quantitative reverse transcription-PCR assay for high-throughput detection  
703 of Rift Valley fever virus. *J Clin Microbiol*. 45(11):3506-13. PMID: PMC2168471.
- 704 20. Platt DJ, Smith AM, Arora N, Diamond MS, Coyne CB, Miner JJ. 2018. Zika virus-  
705 related neurotropic flaviviruses infect human placental explants and cause fetal demise in mice.  
706 *Sci Transl Med*. 10(426).
- 707 21. Bales JM, Powell DS, Bethel LM, Reed DS, Hartman AL. 2012. Choice of inbred rat  
708 strain impacts lethality and disease course after respiratory infection with Rift Valley Fever  
709 Virus. *Frontiers in cellular and infection microbiology*. 2:105. PMID: PMC3417668.
- 710 22. Peters CJ, Slone TW. 1982. Inbred rat strains mimic the disparate human response to Rift  
711 Valley fever virus infection. *J Med Virol*. 10(1):45-54.

- 712 23. Caroline AL, Kujawa MR, Oury TD, Reed DS, Hartman AL. 2015. Inflammatory  
713 Biomarkers Associated with Lethal Rift Valley Fever Encephalitis in the Lewis Rat Model. *Front*  
714 *Microbiol.* 6:1509. PMID: PMC4703790.
- 715 24. Soares MJ, Chakraborty D, Karim Rumi MA, Konno T, Renaud SJ. 2012. Rat  
716 placentation: an experimental model for investigating the hemochorial maternal-fetal interface.  
717 *Placenta.* 33(4):233-43. PMID: PMC3288880.
- 718 25. Segal L, Thacker K, Fochesato M, Giordano G, Garçon N, Destexhe E. 2017.  
719 Intramuscularly administered herpes zoster subunit vaccine has no effects on fertility, pre- and  
720 post-natal development in Sprague-Dawley rats. *Reproductive Toxicology.* 69:297-307.
- 721 26. Segal L, Wilby OK, Willoughby CR, Veenstra S, Deschamps M. 2011. Evaluation of the  
722 intramuscular administration of Cervarix™ vaccine on fertility, pre- and post-natal development  
723 in rats. *Reproductive Toxicology.* 31(1):111-20.
- 724 27. Ohkawara T, Katsuyama T, Ida-Eto M, Narita N, Narita M. 2015. Maternal viral  
725 infection during pregnancy impairs development of fetal serotonergic neurons. *Brain and*  
726 *Development.* 37(1):88-93.
- 727 28. Swanson AM, David AL. 2015. Animal models of fetal growth restriction:  
728 Considerations for translational medicine. *Placenta.* 36(6):623-30.
- 729 29. Pijnenborg R, Robertson WB, Brosens I, Dixon G. 1981. Review article: trophoblast  
730 invasion and the establishment of haemochorial placentation in man and laboratory animals.  
731 *Placenta.* 2(1):71-91.
- 732 30. World Health Organization. Rift Valley Fever fact sheet 2017. Available from:  
733 <http://www.who.int/mediacentre/factsheets/fs207/en/>.
- 734 31. Coetzer JA. 1982. The pathology of Rift Valley fever. II. Lesions occurring in field cases  
735 in adult cattle, calves and aborted fetuses. *Onderstepoort J Vet Res.* 49(1):11-7.
- 736 32. Szaba FM, Tighe M, Kummer LW, Lanzer KG, Ward JM, Lanthier P, Kim IJ, Kuki A,  
737 Blackman MA, Thomas SJ, Lin JS. 2018. Zika virus infection in immunocompetent pregnant  
738 mice causes fetal damage and placental pathology in the absence of fetal infection. *PLoS*  
739 *pathogens.* 14(4):e1006994. PMID: PMC5909921.
- 740 33. Suffin SC, Muck KB, Porter DD. 1977. Vesicular stomatitis virus causes abortion and  
741 neonatal death in ferrets. *J Clin Microbiol.* 6(4):437-8. PMID: PMC274789.
- 742 34. Arora N, Sadovsky Y, Dermody TS, Coyne CB. 2017. Microbial Vertical Transmission  
743 during Human Pregnancy. *Cell host & microbe.* 21(5):561-7.
- 744 35. Kourtis AP, Read JS, Jamieson DJ. 2014. Pregnancy and infection. *The New England*  
745 *journal of medicine.* 370(23):2211-8. PMID: PMC4459512.



- 746 36. Silasi M, Cardenas I, Kwon JY, Racicot K, Aldo P, Mor G. 2015. Viral Infections During  
747 Pregnancy. *American Journal of Reproductive Immunology*. 73(3):199-213.
- 748 37. Mosby LG, Rasmussen SA, Jamieson DJ. 2011. 2009 pandemic influenza A (H1N1) in  
749 pregnancy: a systematic review of the literature. *American journal of obstetrics and gynecology*.  
750 205(1):10-8.
- 751 38. Neuzil KM, Reed GW, Mitchel EF, Simonsen L, Griffin MR. 1998. Impact of influenza  
752 on acute cardiopulmonary hospitalizations in pregnant women. *Am J Epidemiol*. 148(11):1094-  
753 102.
- 754 39. Price ME, Fisher-Hoch SP, Craven RB, McCormick JB. 1988. A prospective study of  
755 maternal and fetal outcome in acute Lassa fever infection during pregnancy. *Bmj*.  
756 297(6648):584-7. PMID: PMCPMC1834487.
- 757 40. Mupapa K, Mukundu W, Bwaka MA, Kipasa M, De Roo A, Kuvula K, Kibadi K,  
758 Massamba M, Ndaberey D, Colebunders R, Muyembe-Tamfum JJ. 1999. Ebola hemorrhagic  
759 fever and pregnancy. *J Infect Dis*. 179 Suppl 1:S11-2.
- 760 41. Niklasson B, Liljestrand J, Bergstrom S, Peters CJ. 1987. Rift Valley fever: a sero-  
761 epidemiological survey among pregnant women in Mozambique. *Epidemiology and infection*.  
762 99(2):517-22. PMID: PMCPMC2249273.
- 763 42. Gomet C, Billecocq A, Jouvion G, Hasan M, Zaverucha do Valle T, Guillemot L,  
764 Blanchet C, van Rooijen N, Montagutelli X, Bouloy M, Panthier JJ. 2011. Tissue tropism and  
765 target cells of NSs-deleted rift valley fever virus in live immunodeficient mice. *PLoS neglected*  
766 *tropical diseases*. 5(12):e1421. PMID: PMC3232203.
- 767 43. Coetzer JA, Barnard BJ. 1977. Hydrops amnii in sheep associated with hydranencephaly  
768 and arthrogryposis with wesselsbron disease and rift valley fever viruses as aetiological agents.  
769 *Onderstepoort J Vet Res*. 44(2):119-26.
- 770 44. Crane J, Mundle W, Boucoiran I, Gagnon R, Bujold E, Basso M, Bos H, Brown R,  
771 Cooper S, Gouin K, McLeod NL, Menticoglou S, Pylypjuk C, Roggensack A, Sanderson F.  
772 2014. Parvovirus B19 Infection in Pregnancy. *Journal of Obstetrics and Gynaecology Canada*.  
773 36(12):1107-16.
- 774 45. Gao YL, Gao Z, He M, Liao P. 2018. Infection status of human parvovirus B19,  
775 cytomegalovirus and herpes simplex Virus-1/2 in women with first-trimester spontaneous  
776 abortions in Chongqing, China. *Virology Journal*. 15(1).
- 777 46. Sarno M, Sacramento GA, Khouri R, do Rosário MS, Costa F, Archanjo G, Santos LA,  
778 Nery N, Vasilakis N, Ko AI, de Almeida ARP. 2016. Zika Virus Infection and Stillbirths: A  
779 Case of Hydrops Fetalis, Hydranencephaly and Fetal Demise. *PLoS neglected tropical diseases*.  
780 10(2).
- 781 47. Valentine G, Marquez L, Pammi M. 2016. Zika virus epidemic: an update. *Expert*  
782 *Review of Anti-Infective Therapy*. 14(12):1127-38.

- 783 48. Bayer A, Lennemann NJ, Ouyang Y, Bramley JC, Morosky S, Marques ET, Jr., Cherry  
784 S, Sadovsky Y, Coyne CB. 2016. Type III Interferons Produced by Human Placental  
785 Trophoblasts Confer Protection against Zika Virus Infection. *Cell host & microbe*. 19(5):705-12.  
786 PMID: PMCPMC4866896.
- 787 49. Jagger BW, Miner JJ, Cao B, Arora N, Smith AM, Kovacs A, Mysorekar IU, Coyne CB,  
788 Diamond MS. 2017. Gestational Stage and IFN-lambda Signaling Regulate ZIKV Infection In  
789 Utero. *Cell host & microbe*. 22(3):366-76 e3. PMID: PMCPMC5647680.
- 790 50. Delorme-Axford E, Donker RB, Mouillet JF, Chu T, Bayer A, Ouyang Y, Wang T, Stolz  
791 DB, Sarkar SN, Morelli AE, Sadovsky Y, Coyne CB. 2013. Human placental trophoblasts confer  
792 viral resistance to recipient cells. *Proc Natl Acad Sci U S A*. 110(29):12048-53. PMID:  
793 PMCPMC3718097.
- 794 51. Corry J, Arora N, Good CA, Sadovsky Y, Coyne CB. 2017. Organotypic models of type  
795 III interferon-mediated protection from Zika virus infections at the maternal-fetal interface. *Proc*  
796 *Natl Acad Sci U S A*. 114(35):9433-8. PMID: PMCPMC5584447.
- 797 52. Grigsby PL. 2016. Animal Models to Study Placental Development and Function  
798 throughout Normal and Dysfunctional Human Pregnancy. *Semin Reprod Med*. 34(1):11-6.  
799 PMID: PMCPMC4799492.
- 800 53. Oreshkova N, van Keulen L, Kant J, Moormann RJ, Kortekaas J. 2013. A single  
801 vaccination with an improved nonspreading Rift Valley fever virus vaccine provides sterile  
802 immunity in lambs. *PloS one*. 8(10):e77461. PMID: PMCPMC3805595.
- 803 54. Makoschey B, van Kilsdonk E, Hubers WR, Vrijenhoek MP, Smit M, Wichgers Schreur  
804 PJ, Kortekaas J, Moulin V. 2016. Rift Valley Fever Vaccine Virus Clone 13 Is Able to Cross the  
805 Ovine Placental Barrier Associated with Foetal Infections, Malformations, and Stillbirths. *PLoS*  
806 *neglected tropical diseases*. 10(3).
- 807

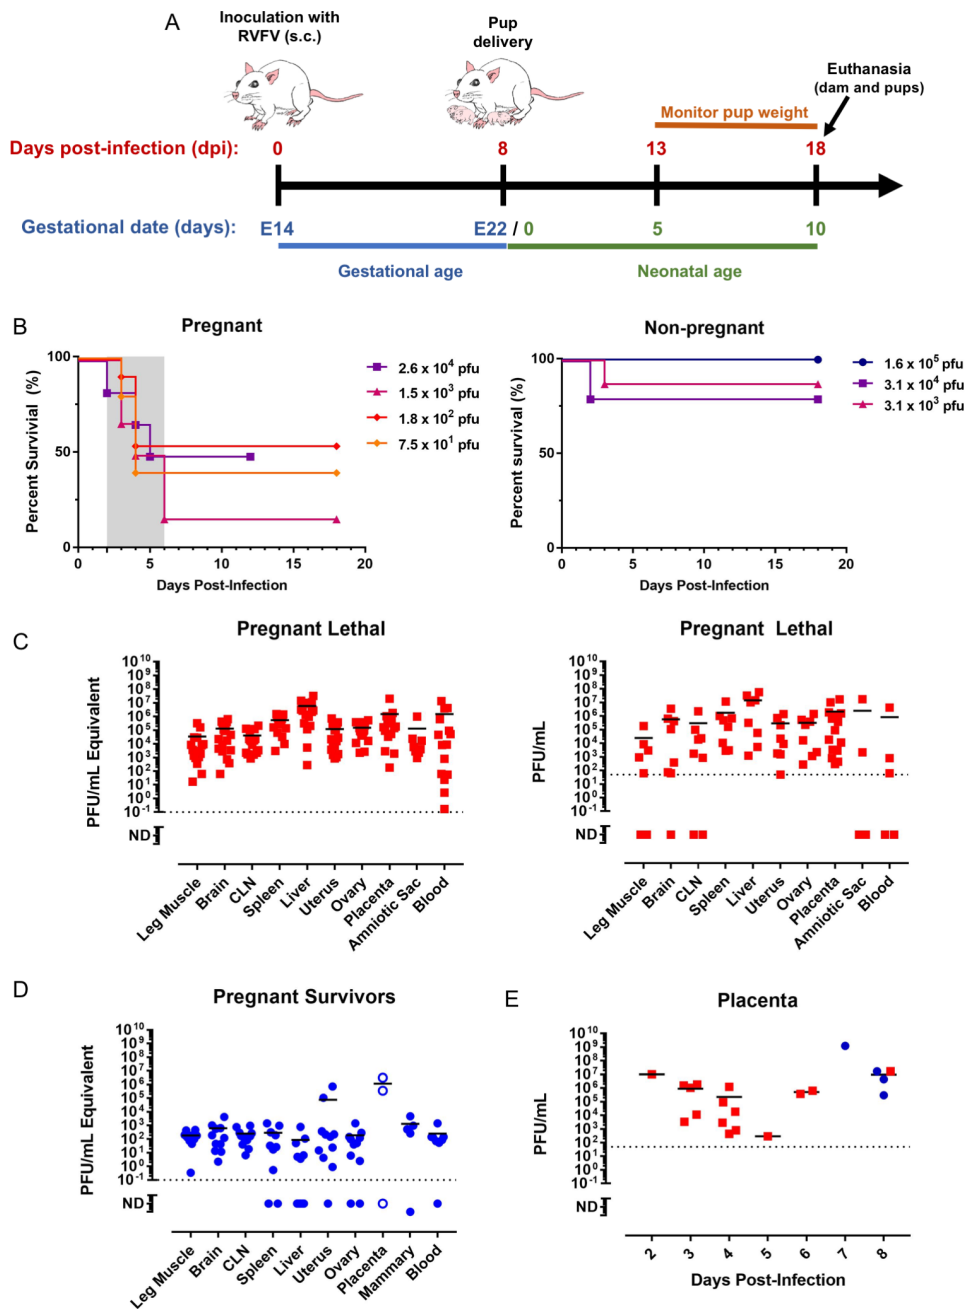

**Figure 1: Pregnant rats are more susceptible to death after RVFV infection, with virus homing to the liver and placenta.** (A) Experimental design for E14 SD rats infected with RVFV. After delivery at E22, dams and pups were not disturbed until 5 days post-delivery (13 dpi). Euthanasia of surviving dams and pups occurred 18 dpi (10 days post-delivery). (B) Survival of RVFV-infected pregnant dams and non-pregnant SD rats (n=3-6 per dose). The shaded area represents the 2- to 6-day clinical window when lethally-infected pregnant rats were euthanized due to severe disease. (C) vRNA (q-RT-PCR; left) and infectious virus (VPA; right) in tissues from pregnant rats that succumbed (red squares; n=17) between 2-6 dpi. (D) vRNA in tissue samples from pregnant rats that survived infection (blue circles; n=11) and were euthanized 18 dpi. Placenta samples (open blue circles) were obtained at day of delivery (8 dpi). (E) Infectious virus measured by VPA in placental samples obtained from lethally infected (red squares) and surviving (blue circles) rats at the indicated day after infection. CLN; cervical lymph node. Dashed horizontal lines represent the limits of detection (LOD) of the q-RT-PCR (0.1 PFU equivalent/mL) and VPA (50 PFU). ND, not detected (below the LOD).

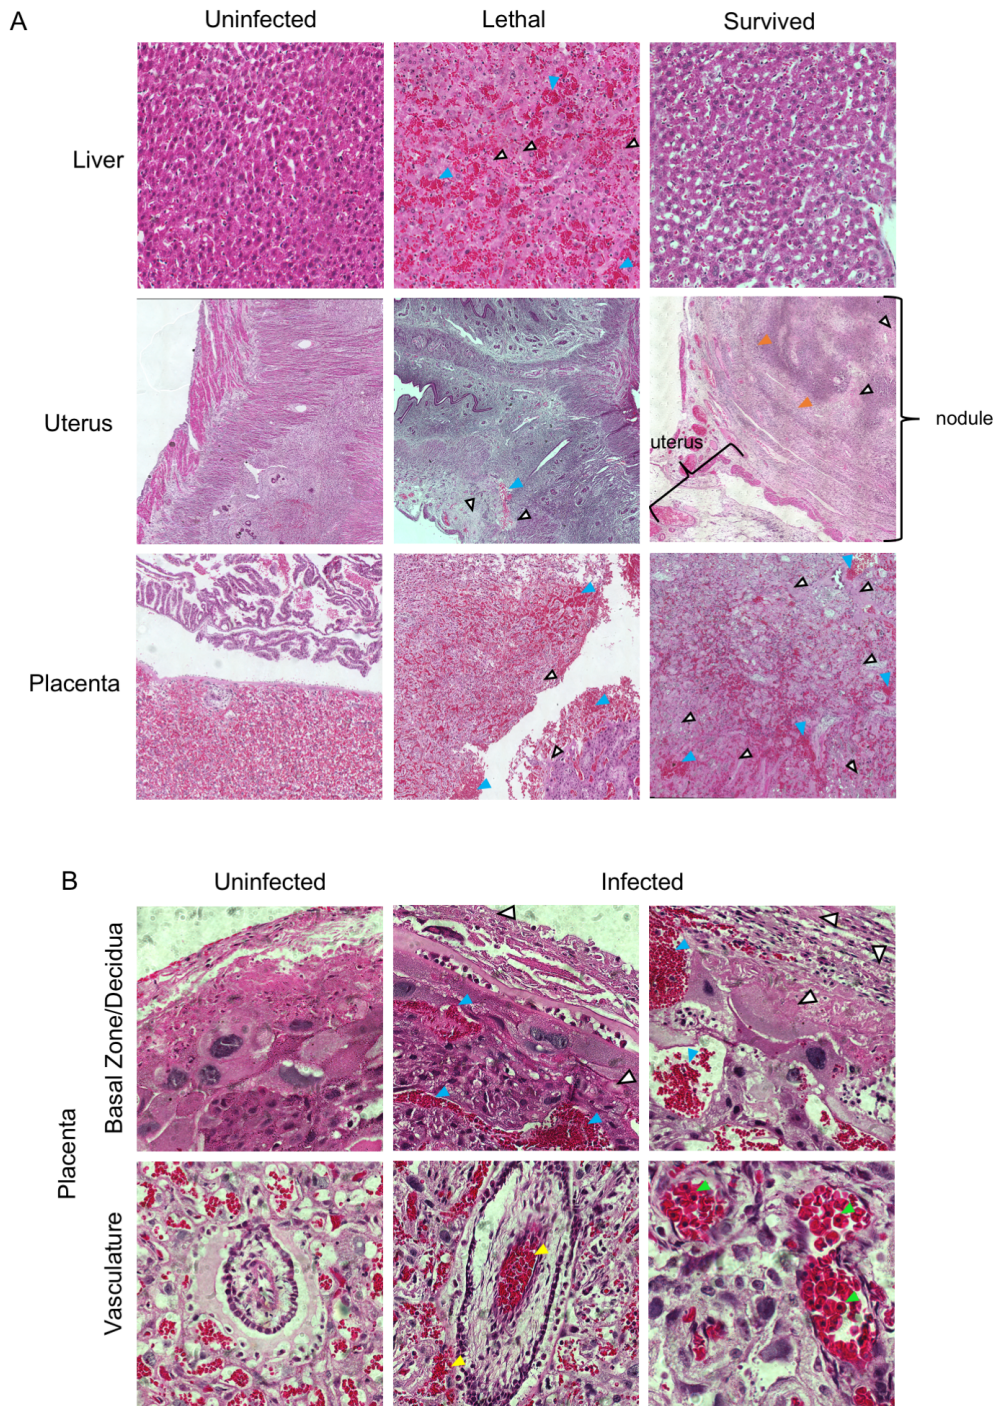

**Figure 2: RVFV causes pathology within the liver, uterus and placenta of pregnant dams.** H&E staining within the indicated tissues. (A) 20x images of liver, uterus, and placenta. (B) 60x images of placenta. Blue, white, yellow, orange, or green arrow heads highlight evidence of hemorrhaging, necrosis, vascular/perivascular congestion, calcification, or nucleated red blood cells, respectively.

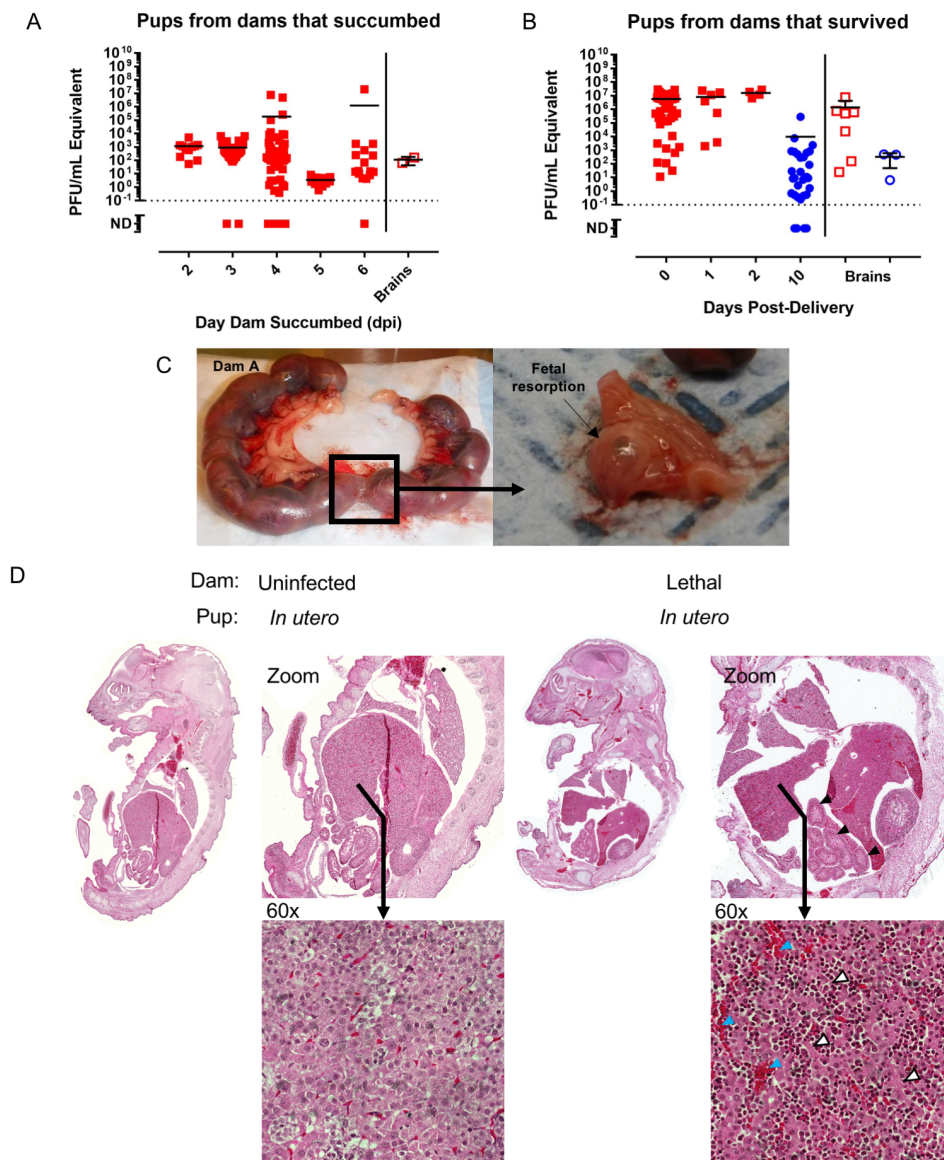

**Figure 3: Infection of pregnant dams results in direct transmission of RVFV to the peritoneum and brain of pups.** Pups delivered from (A) lethally-infected and (B) surviving pregnant rats were tested for vRNA within the peritoneal cavity (left) and brain (right). In (A), the x-axis represents the day the dams were euthanized due to severe disease. In (B), the x-axis represents the day post-delivery, with day 10 representing surviving pups euthanized at the end of the study. For both graphs, red square data points indicate pup demise and blue circle data points indicate pup survival. Open data points are pup brain tissues; all closed data points are pup peritoneal cavity. (C) Photographic evidence of fetal resorption within the uterus of one of three dams that succumbed to RVFV infection. (D) 10x images of whole pups were examined for histological changes. H&E staining of a whole pup from a dam that succumbed to infection (right) or a corresponding uninfected control rat (left) euthanized at the same day of gestation. Blue, white, and black arrow heads highlight evidence of hemorrhaging, necrosis, or altered intestinal structure, respectively.

A Dam 1:

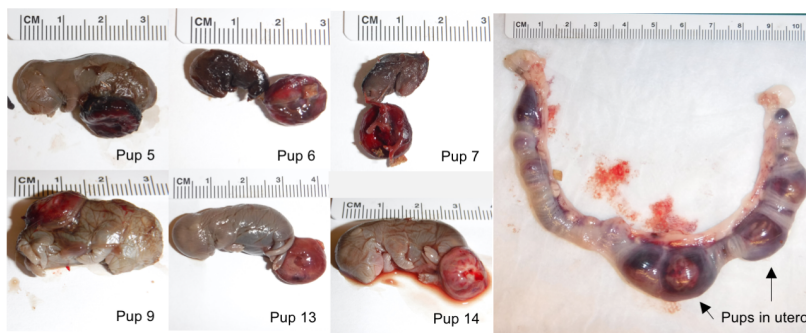

B

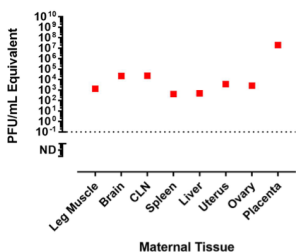

C

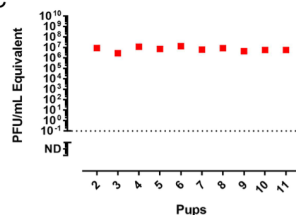

D

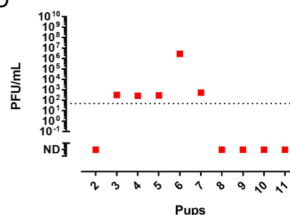

E

Dam 2:

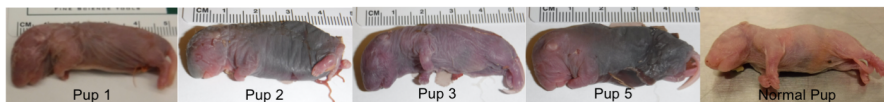

F

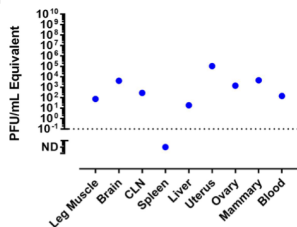

G

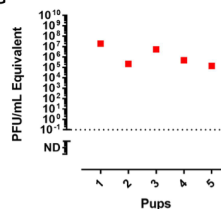

H

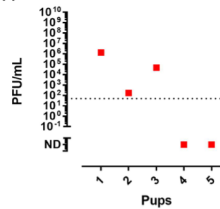

**Figure 4: Vertical transmission of RVFV in 2 dams resulted in still-born pups with physiological abnormalities and high viral titers.** (A-D) Dam 1 was inoculated with 175 PFU and died giving birth at 8 dpi. Dam 1 delivered 13 still-born pups, with 2 remaining in the uterus. (A) Pictures of individual pups are shown as numbered. Uterus with pups 13 and 14 within birth canal post-demise. (B) vRNA within maternal tissue. (C) vRNA and (D) infectious virus within peritoneal cavity of indicated pups. The three pups not included in the graphs were used for other analyses. (E-H) Dam 2 was inoculated with 175 PFU and survived with no clinical signs of disease. Dam 2 delivered 7 pups to full-term; 5 were dead and 2 were alive but subsequently consumed by the dam (data not available). (E) Pictures of individual pups as labeled. A normal pup from an uninfected dam is shown for comparison. (F) vRNA within maternal tissue. (G) vRNA and (H) infectious virus within peritoneal cavity of indicated pups. For all graphs, red square data points indicate either dam or pup demise. Blue circle data points indicate dam or pup survival.

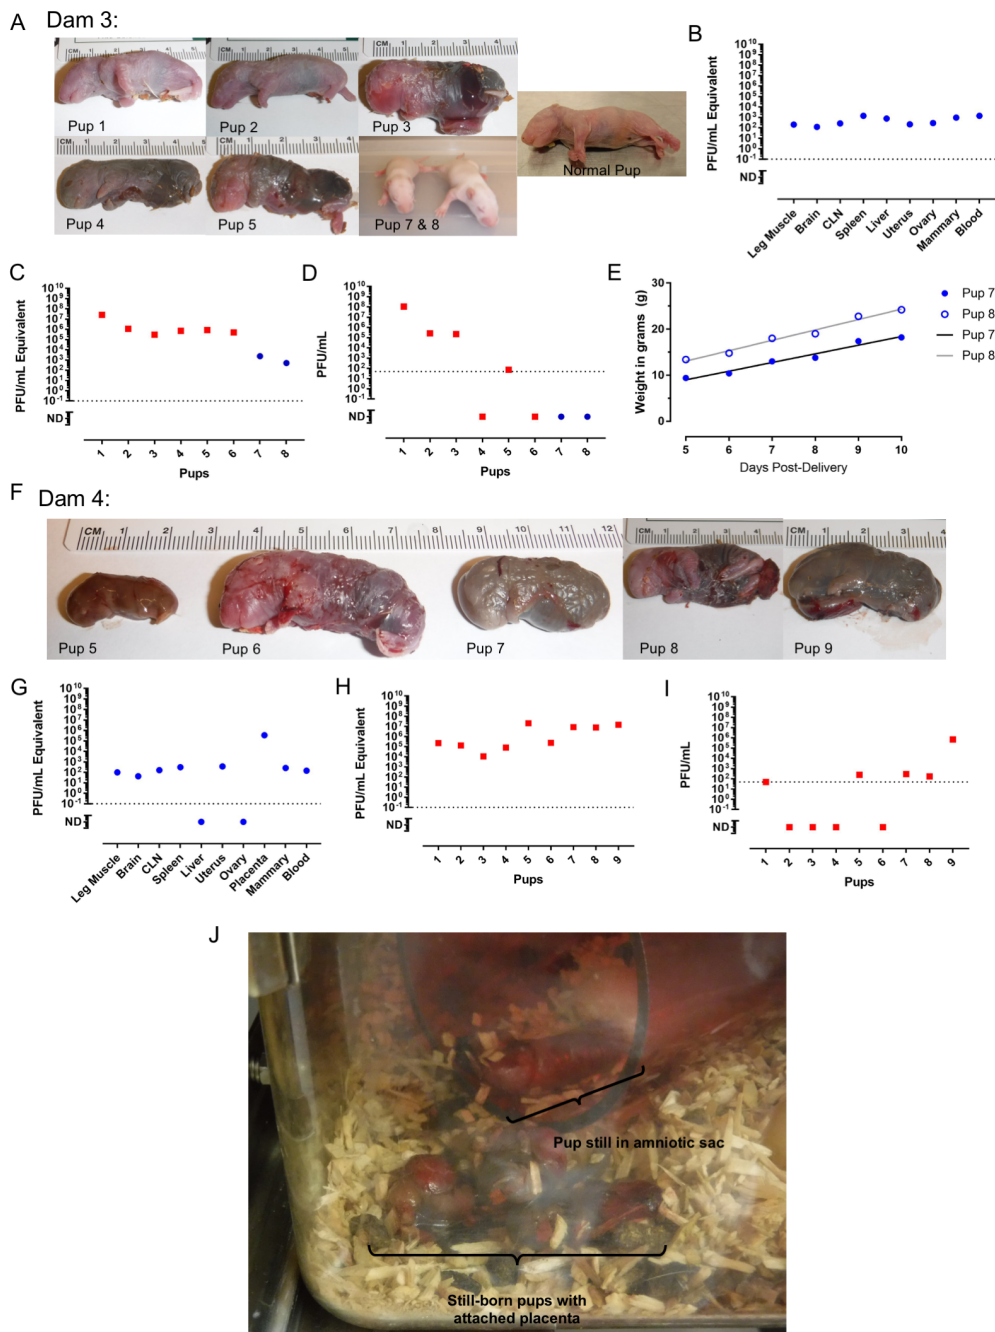

**Figure 5: Evidence of variable survival and physiological outcome of pups resulting from vertical transmission.** (A-E) Dam 3 was inoculated with 175 PFU and survived with no clinical signs of disease. Dam 3 delivered 10 pups to full-term; 6 dead and 4 alive. Two living pups were consumed by the dam within 2 days of birth (data not available). Two remaining pups survived to the end of the study (pups 7 and 8). (B) vRNA within maternal tissue. (C) vRNA and (D) infectious virus within peritoneal cavity of indicated pups. (E) Weight of surviving pups from dam 3 from days 5 to 10 neonate. Black or grey lines represent growth curve calculated by linear regression modeling of pup 7 or 8, respectively. (F-J) Dam 4 was inoculated with 1300 PFU and survived with no clinical signs of disease. Dam 4 delivered 9 still-born pups. (F) Pictures of individual pups as labeled. (G) vRNA within maternal tissue. (H) vRNA and (I) infectious virus within peritoneal cavity of indicated pups. (J) Cage of dam 4 as it was found on day of pup delivery (E22; 8 dpi).

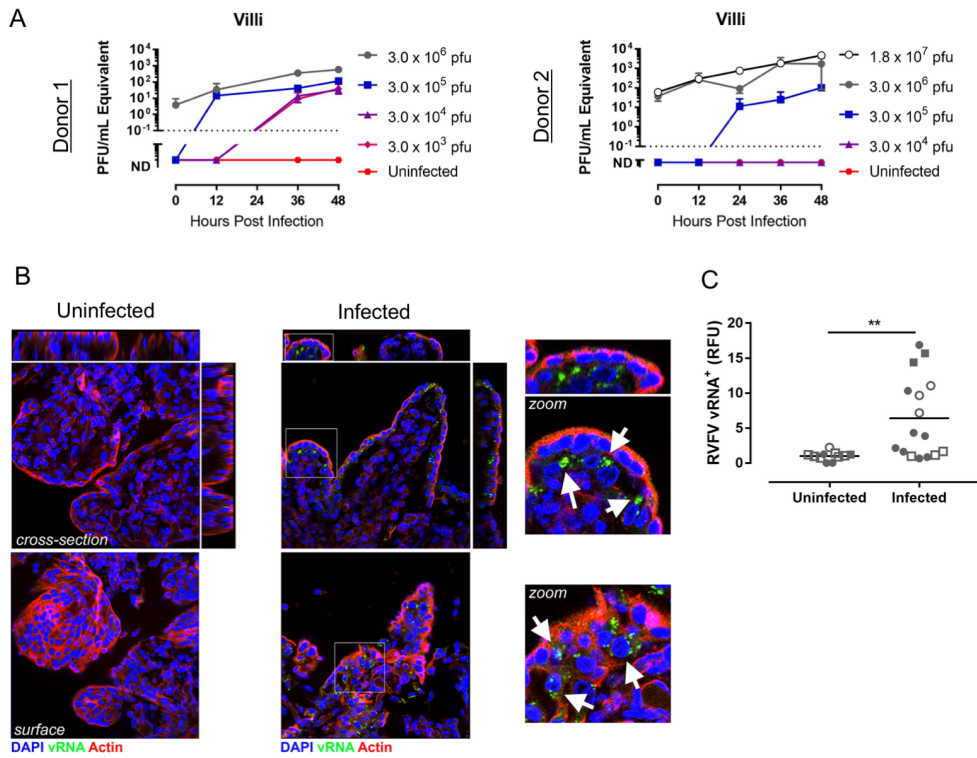

**Figure 6: RSVFV replicates in human placental tissue, even the highly resistant syncytiotrophoblasts within placenta villi.** Human chorionic villous tissue explants from donors 1 and 2 (A) were infected *in vitro* with RSVFV at the indicated doses, then supernatant was harvested at 0, 12, 24, 36 and 48 hours post-infection for measurement of vRNA by q-RT-PCR. (B) Immunofluorescent microscopy images of villi infected with 3 x 10<sup>6</sup> pfu RSVFV for 48 hours. Uninfected control shown in left panels. DAPI (blue) stains DNA, J2 antibody (green) stains dsRNA of RSVFV, cytokeratin 19 (red) stains epithelial cells, actin (purple) stains all cells. (C) Fluorescent dsRNA signal (relative fluorescent units, RFU) was quantified from 4 human donors. Data from uninfected (n=11) and infected (n=16) villi are shown with symbols stratified by donor (close circles, donor 1; open circles, donor 2; closed squares, donor 3; open squares, donor 4).



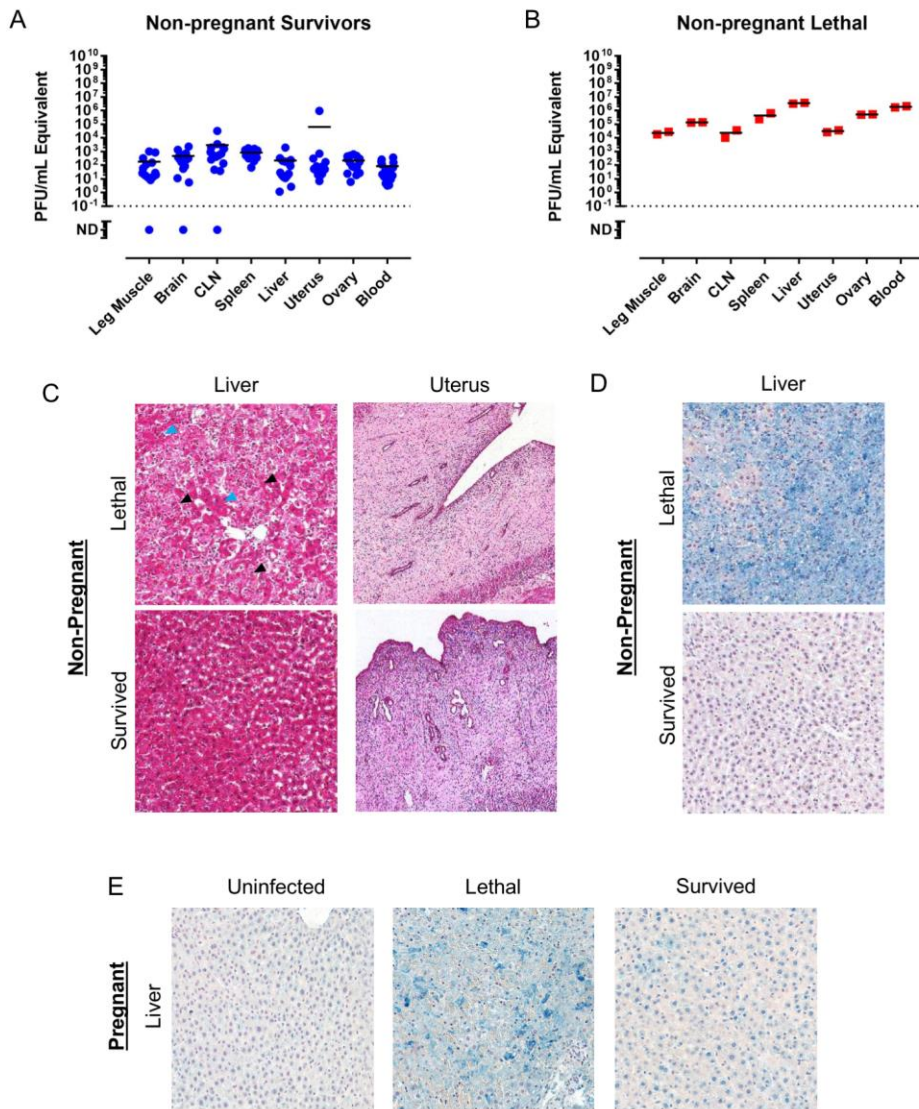

**Supplemental Figure 1: RLVFV is present in the ovary and uterus of non-pregnant female rats.** Tissues from non-pregnant female rats shown in Fig. 1B were tested for vRNA by q-RT-PCR. Rats that (A) survived (n=15) or (B) succumbed (n=2) to infection. (C) H&E staining or (D,E) chromogen staining (blue) for RLVFV antigen in the indicated tissues. (C,D) tissues from infected non-pregnant rats that succumbed to infection (2 dpi) or survived infection (18 dpi). (E) RLVFV antigen staining of liver from uninfected, lethal (4 dpi), or surviving pregnant dams (18 dpi; E14). Black arrow heads highlight necrotic tissue. Blue arrow heads highlight evidence of hemorrhaging. 20x objective images.

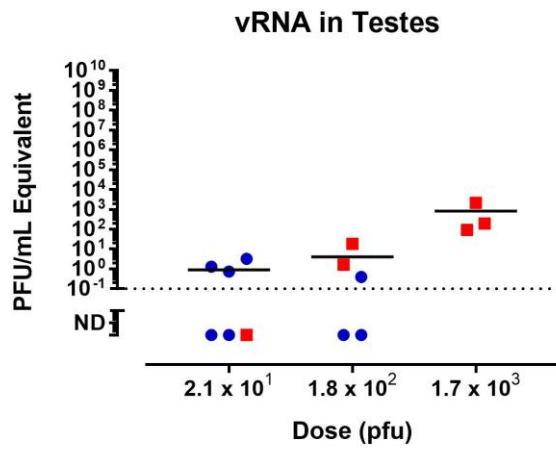

**Supplemental Figure 2: Detection of vRNA in the testes.** Male Lewis rats were infected with RVFV (s.c.). Testes samples were taken from rats that succumbed to disease (red squares) and those that survived (blue circles) and tested for vRNA by q-RT-PCR.

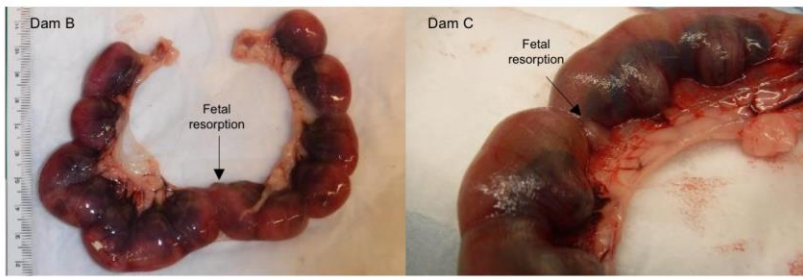

**Supplemental Figure 3: RVFV infection leads to fetal resorption.** Photographic evidence of fetal resorption within the uterus of two of three dams who succumbed to RVFV infection.

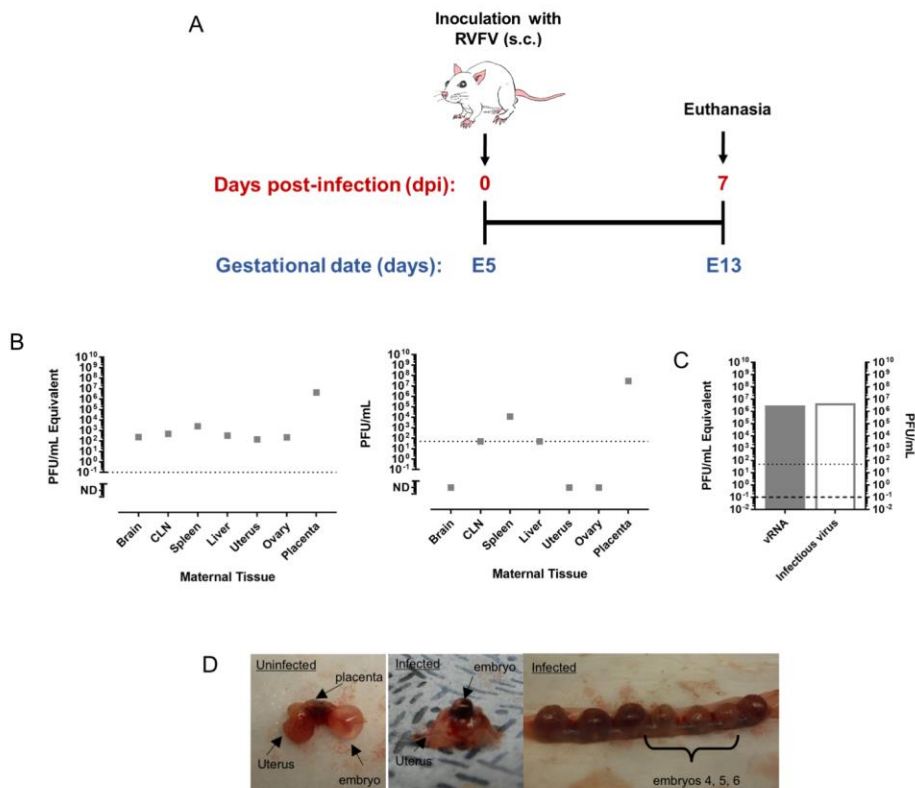

**Supplemental Figure 4: Evidence of vertical transmission in a RVFV infected early gestation (E5) pregnant dam, with high viral titers in the placenta.** (A) An early gestation (E5) dam was infected with  $1.46 \times 10^5$  pfu (s.c.) and then euthanized at the pre-determined date of 7 dpi (E13) with no signs of disease. (B) vRNA (left) and infectious virus (right) within maternal tissue. (C) vRNA (left y-axis, solid grey bar) and infectious virus (right y-axis, open grey bar) within pooled embryos (16 embryos). (D) Photographic evidence of embryos from uninfected or infected dams at E13. Uterus containing embryos from an infected dam (right panel).
